# Supplementary material for: Measuring the impact of a social programme on healthcare: a 10-year retrospective cohort study in Trieste, Italy
Source: PubMed Central journal article supplement — BMJ Open. 2020 Jul 23;10(7):e036857. doi: 10.1136/bmjopen-2020-036857 (PMC7413194; doi:10.1136/bmjopen-2020-036857), 2020-07-23
Supplement: bmjopen-2020-036857.draft_revisions.pdf [file bmjopen-2020-036857.draft_revisions.pdf]

# BMJ Open

BMJ Open is committed to open peer review. As part of this commitment we make the peer review history of every article we publish publicly available.

When an article is published we post the peer reviewers' comments and the authors' responses online. We also post the versions of the paper that were used during peer review. These are the versions that the peer review comments apply to.

The versions of the paper that follow are the versions that were submitted during the peer review process. They are not the versions of record or the final published versions. They should not be cited or distributed as the published version of this manuscript.

BMJ Open is an open access journal and the full, final, typeset and author-corrected version of record of the manuscript is available on our site with no access controls, subscription charges or pay-per-view fees (<http://bmjopen.bmj.com>).

If you have any questions on BMJ Open's open peer review process please email [info.bmjopen@bmj.com](mailto:info.bmjopen@bmj.com)

# BMJ Open

## Measuring the impact on the healthcare of a 10-year social programme in Trieste (Italy): a retrospective cohort study.

|                               |                                                                                                                                                                                                                                                                                                                                                                                                                                                                                                                                                                                                                                                                                                                                                                                                                                                 |
|-------------------------------|-------------------------------------------------------------------------------------------------------------------------------------------------------------------------------------------------------------------------------------------------------------------------------------------------------------------------------------------------------------------------------------------------------------------------------------------------------------------------------------------------------------------------------------------------------------------------------------------------------------------------------------------------------------------------------------------------------------------------------------------------------------------------------------------------------------------------------------------------|
| Journal:                      | <i>BMJ Open</i>                                                                                                                                                                                                                                                                                                                                                                                                                                                                                                                                                                                                                                                                                                                                                                                                                                 |
| Manuscript ID                 | bmjopen-2020-036857                                                                                                                                                                                                                                                                                                                                                                                                                                                                                                                                                                                                                                                                                                                                                                                                                             |
| Article Type:                 | Original research                                                                                                                                                                                                                                                                                                                                                                                                                                                                                                                                                                                                                                                                                                                                                                                                                               |
| Date Submitted by the Author: | 07-Jan-2020                                                                                                                                                                                                                                                                                                                                                                                                                                                                                                                                                                                                                                                                                                                                                                                                                                     |
| Complete List of Authors:     | Castriotta, Luigi; Azienda Sanitaria Universitaria Integrata di Udine, Istituto di Igiene ed Epidemiologia Clinica<br>Giangreco, Manuela; Istituto di Ricovero e Cura a Carattere Scientifico materno infantile Burlo Garofolo<br>Cogliati-Dezza, Maria Grazia; Azienda Sanitaria Universitaria Integrata di Trieste<br>Spanò, Marco; Azienda Sanitaria Universitaria Integrata di Trieste<br>Atrigna, Enrico; Azienda Sanitaria Universitaria Integrata di Trieste<br>Ehrenfreund, Claudia; Azienda Sanitaria Universitaria Integrata di Trieste<br>Rosolen, Valentina; Istituto di Ricovero e Cura a Carattere Scientifico materno infantile Burlo Garofolo<br>Paoletti, Flavio; Azienda Sanitaria Universitaria Integrata di Trieste<br>Barbone, Fabio; Istituto di Ricovero e Cura a Carattere Scientifico materno infantile Burlo Garofolo |
| Keywords:                     | PUBLIC HEALTH, EPIDEMIOLOGY, SOCIAL MEDICINE                                                                                                                                                                                                                                                                                                                                                                                                                                                                                                                                                                                                                                                                                                                                                                                                    |
|                               |                                                                                                                                                                                                                                                                                                                                                                                                                                                                                                                                                                                                                                                                                                                                                                                                                                                 |

SCHOLARONE™  
Manuscripts

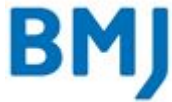

I, the Submitting Author has the right to grant and does grant on behalf of all authors of the Work (as defined in the below author licence), an exclusive licence and/or a non-exclusive licence for contributions from authors who are: i) UK Crown employees; ii) where BMJ has agreed a CC-BY licence shall apply, and/or iii) in accordance with the terms applicable for US Federal Government officers or employees acting as part of their official duties; on a worldwide, perpetual, irrevocable, royalty-free basis to BMJ Publishing Group Ltd ("BMJ") its licensees and where the relevant Journal is co-owned by BMJ to the co-owners of the Journal, to publish the Work in this journal and any other BMJ products and to exploit all rights, as set out in our [licence](#).

The Submitting Author accepts and understands that any supply made under these terms is made by BMJ to the Submitting Author unless you are acting as an employee on behalf of your employer or a postgraduate student of an affiliated institution which is paying any applicable article publishing charge ("APC") for Open Access articles. Where the Submitting Author wishes to make the Work available on an Open Access basis (and intends to pay the relevant APC), the terms of reuse of such Open Access shall be governed by a Creative Commons licence – details of these licences and which [Creative Commons](#) licence will apply to this Work are set out in our licence referred to above.

Other than as permitted in any relevant BMJ Author's Self Archiving Policies, I confirm this Work has not been accepted for publication elsewhere, is not being considered for publication elsewhere and does not duplicate material already published. I confirm all authors consent to publication of this Work and authorise the granting of this licence.

## TITLE

Measuring the impact on the healthcare of a 10-year social programme in Trieste (Italy): a retrospective cohort study.

## AUTHORS

1. Luigi Castriotta (*corresponding author*). Azienda Sanitaria Universitaria Integrata di Udine. Via Pozzuolo 330, 33100 Udine. Italy.  
[luigi.castriotta@asuiud.sanita.fvg](mailto:luigi.castriotta@asuiud.sanita.fvg)
2. Manuela Giangreco. IRCCS Burlo Garofolo, Trieste. Via dell'Istria, 65, 34137 Trieste. Italy [manuela.giangreco@burlo.trieste.it](mailto:manuela.giangreco@burlo.trieste.it)
3. Maria Grazia Cogliati-Dezza. Azienda Sanitaria Universitaria Integrata di Trieste. Via Giovanni Sai 7, 34128 Trieste. Italy.  
[mariagrazia.cogliati@gmail.com](mailto:mariagrazia.cogliati@gmail.com)
4. Marco Spanò. Azienda Sanitaria Universitaria Integrata di Trieste. Via Giovanni Sai 7, 34128 Trieste. Italy. [marco.spano@asuits.sanita.fvg.it](mailto:marco.spano@asuits.sanita.fvg.it)
5. Enrico Atrigna. Azienda Sanitaria Universitaria Integrata di Trieste. Via Giovanni Sai 7, 34128 Trieste. Italy. [enrico.atrigna@asuits.sanita.fvg.it](mailto:enrico.atrigna@asuits.sanita.fvg.it)
6. Claudia Ehrenfreund. Azienda Sanitaria Universitaria Integrata di Trieste. Via Giovanni Sai 7, 34128 Trieste. Italy. [claudia.ehrenfreund@asuits.sanita.fvg.it](mailto:claudia.ehrenfreund@asuits.sanita.fvg.it)
7. Valentina Rosolen. IRCCS Burlo Garofolo, Trieste. Via dell'Istria, 65, 34137 Trieste. Italy [valentina.rosolen@burlo.trieste.it](mailto:valentina.rosolen@burlo.trieste.it)
8. Flavio Paoletti. Azienda Sanitaria Universitaria Integrata di Trieste. Via Giovanni Sai 7, 34128 Trieste. Italy. [flavio.paoletti@asuits.sanita.fvg.it](mailto:flavio.paoletti@asuits.sanita.fvg.it)
9. Fabio Barbone. IRCCS Burlo Garofolo, Trieste. Via dell'Istria, 65, 34137 Trieste. Italy [direzione.scientifica@burlo.trieste.it](mailto:direzione.scientifica@burlo.trieste.it)

## ABSTRACT

### Objectives

Poor social conditions are strong determinants of poor health but positive health and healthcare changes caused by social interventions are difficult to demonstrate. In Trieste (Italy), in 2006, in eight deprived neighbourhoods, a social intervention known as “Habitat Microaree” (HM) project was started. In 2016, an observational study was launched to assess the impact of the HM project on healthcare.

### Design

Retrospective cohort study.

### Setting

The Eight geographically defined neighbourhoods of Trieste involved in the HM project in 2006, which accounted for a total of 11,380 residents.

### Participants

Participants were all residents in the intervention areas. By means of a propensity score based on deprivation index, age, sex, Charlson index and drug utilization, a non-participating, comparison group was defined.

### Intervention

The community-based intervention consisted of facilitating access to social services and outpatient healthcare facilities, coordinating intersectoral public services and specifically planning hospital discharge. These services were not provided in other areas of the city.

### Outcome measures

Hospital admissions and Emergency Department access.

## Results

We followed 16,256 subjects between 2008 and 2015. Living in microareas was associated with a hazard ratio (HR) for 1<sup>st</sup> hospital admission, for all causes, of 0.95 (95% CI: 0.91 – 0.99); while the HR for urgent admissions in females was 0.91 (95%CI 0.87 – 0.97). The HR for psychiatric disorders, in females, was 0.39 (95%CI 0.18 – 0.32); in particular, the HR for psychosis was 0.15 (95%CI 0.05 – 0.51). The HR for acute respiratory diseases in females was 0.44 (95% CI: 0.21 – 0.95). In males, the HR for genitourinary diseases and heart diseases, were 0.65 (95% CI: 0.42 – 1.01) and 0.72 (95% CI: 0.54 – 0.97). Concerning multiple admissions, the odds ratio (OR) in females for fractures was 0.75 (95% CI: 0.57 – 0.97).

## Conclusion

In the study period, the effects on healthcare appear evident, especially in females.

## STRENGTHS AND LIMITATIONS OF THIS STUDY

- This study involved two wide cohorts for a long follow-period and the use of administrative databases, as a data source, provided a complete picture of subjects' access to health care facilities, diagnosis, therapies and treatments in the study period.
- To our knowledge, this is one of few studies that evaluate the effectiveness of a social intervention in terms of impact on health service.
- Our data derive from the administrative databases through an anonymous identifier, therefore, although not all residents were directly involved by the HM project, for our analysis all residents in the selected microareas were considered as participants in the HM project.

- Between 2009 and 2012 the HM project was extended to three other microareas and, therefore, among whom we considered not participants, there were residents who were actually involved by the intervention.
- Our results suggest that the HM project was more effective among females this represents a limit in terms of results generalizability.

## ARTICLE

### Introduction

Material deprivation is an outcome-based measure of material well-being, the material deprivation rate is an indicator in the European Union statistics on income, and living conditions (EU-SILC), adopted by the Social Protection Committee and used by the European Commission to set targets for the Member States. [1-2] Indeed, there is mounting evidence of an association between material deprivation and poor health conditions, regarding particularly chronic diseases which risk increases over life course. [3] A Spanish nationwide small area study aimed to investigate the excess of mortality, by first 10 leading causes, associated to deprivation indexes, found that the higher the deprivation levels the higher the mortality risks, although this relation varied by gender and region. According to the authors, these findings support the idea that material deprivation causes health inequality through two mechanisms: by increasing the general susceptibility to diseases that lead to an excess of mortality for a wide range of causes; and through a set of more specific factors that lead to an excess of mortality for gender-specific causes. [4,5]

Furthermore, it has been showed that there is an increasing trend in annual access to emergency and urgent care in developed countries.[6] Studies from the United States, Canada, the United Kingdom, and Australia consistently reported demand for emergency department (ED) care increased from 3% to 6% per year. Between 1996

1  
2  
3 and 2006, in the United States, accesses to ED rose up from 34.1% to 40.5% while in  
4 United Kingdom demand has more than doubled from 6.8 million ED accesses in  
5 1966 to 14.3 million in 2012. [7-10] However, according to the available studies, this  
6 phenomenon is attributable mainly to people with primary care problems who  
7 improperly use emergency and urgent care services to access care. Relevant  
8 proportions of patients, ranging from 10% to 60%, could be managed using services  
9 with lower and more appropriated care and more accessible primary care may reduce  
10 unplanned secondary care use. [6, 11] Material deprivation is one of the factors that  
11 affect the way health services are used; in a population-based cohort study, Brokamp  
12 et al. [12] found that a 10% increase in the deprivation level caused a 1.03-fold  
13 increase (95% CI 1.03-1.04) in hospitalization length of stay and 1.02-fold increase  
14 (95% CI: 1.01-1.04) in risk for hospital utilization.

15  
16  
17  
18  
19  
20  
21  
22  
23  
24  
25  
26  
27  
28  
29  
30 Despite the magnitude of the evidence on the social determinant of health, very few  
31 large community interventions have been conducted worldwide. A comprehensive  
32 approach to these issues, along with mental and paediatric health, have been the  
33 landmark health initiatives conducted in Trieste in the past 50 years. [13-15] Trieste  
34 lies at the extreme northeast of Italy, close to the borders with Austria and Slovenia.  
35 The area is mostly urban (inhabitants: 234,493; area: 212 km<sup>2</sup>; density: 1,107/km<sup>2</sup>;  
36 age over70: 22.2%; foreign nationality: 10% in 2019). [16] The city has been and still  
37 is rich in contrasts and it owes an important proportion of its affluence to the port  
38 that brought over the centuries a rich tradition of multilingualism and  
39 multiculturalism, although concurrently social inequalities in the physical and social  
40 environment and in health. In particular, in the beginning of the new millennium, the  
41 increase in population aging, prevalence of chronic conditions and polypharmacy, and  
42 inequalities in risk factor distribution and welfare reliance, including public housing,  
43 impacted in uncontrolled access to care that was explained more by social  
44 determinants and unorganized medical supply than by acute clinical progression



1  
2  
3 demand. In particular, there are well defined neighbourhoods of Trieste, known as  
4  
5 “Microaree”, with 500 up to 2500 inhabitants characterized by high prevalence of  
6  
7 social housing, economic and social hardship and a poor environment.  
8  
9

10  
11 To improve the health status and the social capital of these deprived communities, in  
12  
13 2006, the health authorities together with the voluntary sector, the public social  
14  
15 housing and citizens started in eight “Microaree” a proactive joint intervention  
16  
17 program called “Habitat Microaree” (HM). The HM project started on 1 January 2006  
18  
19 in eight “Microaree”, which accounted for a total of 11,380 residents. The project was  
20  
21 set to act at the individual level, by helping the access to health facilities, social  
22  
23 services and also improving the coordination of different services; and at the  
24  
25 community level, supporting hospital discharges. The HM project was designed as a  
26  
27 joint intervention set in people's life contexts and planned to act on multiple levels,  
28  
29 health, social and housing, through a paradigm shift: services no longer as a set of a-  
30  
31 priori defined activities, but co-built with people in order to engage them. To achieve  
32  
33 this goal, eight multi-professional teams were set up, one for each microrarea,  
34  
35 consisting of experts of care pathways from the local health district, social workers  
36  
37 from Trieste municipality and agents from social housing agency. More details about  
38  
39 the HM project are reported elsewhere. [17]  
40  
41  
42  
43

44 To evaluate the effectiveness of this community based social intervention, in 2016,  
45  
46 the University of Udine started a retrospective cohort study to measure the impact  
47  
48 on the local health service. At the same time, in a coordinated way, the University of  
49  
50 Turin began the analysis of the social capital generated by the intervention and the  
51  
52 relationship with the health status. Here we presents the results of the retrospective  
53  
54 cohort study.  
55  
56

## 57 **Methods**

58  
59  
60

1  
2  
3 The study cohort and the associated variables of interest were extracted through  
4 record linkage with the administrative databases of the Regional Repository of  
5 MicroData (RRMD) of Friuli Venezia Giulia region, using an anonymous identifier. The  
6 general population was made up by subjects who had lived in Trieste continuously in  
7 the four years preceding 2006. Based on the address of each subject on 1 January  
8 2006, the general population was categorized as: 1) 'resident in a microarea (M)' and  
9 therefore, for the study purposes, considered as participant in the HM project; 2) 'not  
10 resident in a microarea (NM)' and considered as not participant. In order to make the  
11 two groups comparable, each M subject was matched with a NM subject through  
12 propensity score [18, 19]. We used the Nearest Neighbour Matching method with a  
13 greedy algorithm without replacement. [20-22] The matching variables were: sex, the  
14 2001 deprivation index by Caranci, [23] age at 1 January 2006, the Charlson index [24]  
15 constructed using hospital admissions in the four years preceding 01/01/2006, use of  
16 selected drugs in the year prior to 1 January 2006, identified according to the  
17 Anatomical Therapeutic Chemical classification system (ATC). [25] We considered  
18 hypertension drugs (ATC: 'C02', 'C03', 'C04', 'C07', 'C08'), diabetes drugs (ATC: 'A10A',  
19 'A10B', 'A10X') and ulcer drugs (ATC: from 'A02BC01' to 'A02BC05', 'A02BA', 'A02AA',  
20 'A02AB', 'A02AC', 'A02AD', 'A02AF', 'A02AG', 'A02AH', 'A02AX', 'A02X', from  
21 'A02BD01' to 'A02BD07', 'A02BB', 'A02BX'). At the end of the matching process we  
22 obtained 2 cohorts: the Microarea Cohort (MC) and the Not Microarea Cohort (NMC).  
23 Trying to maximize differences between these two cohorts, we focused our analysis  
24 only on stable residents, and thus we excluded individuals who alternated periods  
25 living in a microarea with periods living in a non-microarea, and, furthermore, we  
26 considered the first two years as latency time. The follow up of the resulting cohorts  
27 lasted, therefore, from 1 January 2008 to 31 December 2015.

28  
29  
30  
31  
32  
33  
34  
35  
36  
37  
38  
39  
40  
41  
42  
43  
44  
45  
46  
47  
48  
49  
50  
51  
52  
53  
54  
55  
56  
57 The study outcomes were 1<sup>st</sup> admission in a regional hospital, 1<sup>st</sup> admission to a local  
58 Emergency Department (ED), multiple admissions to a regional hospital and to a local  
59  
60

1  
2  
3 ED, during the follow-up period. The 1<sup>st</sup> admission in a regional hospital was identified  
4 as the earliest hospital admission for all causes, for each International Classification  
5 of Diseases 9th edition (ICD9-CM) diagnosis blocks, and for each specific diagnosis  
6 (ICD9-CM defined), during the study period. The date of admission was defined as  
7 'index date' and each comorbidity was identified. The 1<sup>st</sup> admission to the ED was  
8 defined as the earliest ED admission for all causes occurring during the follow-up  
9 period, with date of admission as 'index date'.  
10  
11  
12  
13  
14  
15  
16  
17  
18

19 Admissions in regional hospitals were stratified in two groups: Ordinary (Planned+Day  
20 hospital) and Urgent, while ED admissions were analysed according to triage priority  
21 codes: white (not urgent conditions), green (minor injuries or illnesses), yellow  
22 (potentially life threatening conditions) and red (life threatening conditions) codes. In our  
23 analysis we accounted also for multiple hospital admissions and for multiple ED  
24 admissions. Multiple admissions were defined as more admissions of the same  
25 patient in the study period. We categorised multiple admissions in three classes: 0  
26 admissions, 1 admission,  $\geq 2$  admissions.  
27  
28  
29  
30  
31  
32  
33  
34  
35  
36

37 Participants and not participants in the HM project intervention were compared in  
38 terms of 1<sup>st</sup> hospital admission and 1<sup>st</sup> access to ED, using Cox regression models.  
39 Person-time was calculated as difference between index date and beginning of  
40 follow-up. Multiple hospital admissions and ED accesses were analysed using ordered  
41 logistic regression models setting as reference the 0-category. All models were  
42 adjusted by age at the start of follow-up, by Charlson index and by the 2001  
43 deprivation index, and stratified by sex. The statistical software used for the analysis  
44 was the SAS software, Version 9.4 (SAS Institute Inc., Cary, NC, USA). This study was  
45 conducted in accordance with the 1964 Helsinki declaration and its later amendment.  
46  
47  
48  
49  
50  
51  
52  
53  
54  
55  
56

## 57 **Patient and Public Involvement statement**

58  
59  
60

Anonymised patient data, from administrative databases, were used in this study; neither patients nor the public were personally involved.

## Ethics approval

This study did not require ethical approval since data were extracted from the administrative databases of the Regional Repository of MicroData by using an anonymous identifier.

## Results

Subjects belonging to the MC, at the enrolment, were 10,588 and a corresponding number of matching subject from the NMC was found. The steady residents at the beginning of the follow-up period were a total of 16,256 (Table 1).

Table 1. Steady residents in Microarea cohort (MC) and Not Microarea cohort (NMC)

|                      | MC cohort (n. 6963) |              | NMC cohort (n. 9293) |              |
|----------------------|---------------------|--------------|----------------------|--------------|
|                      | Females             | Males        | Females              | Males        |
| <b>n. (%)</b>        | 3793 (54.5%)        | 3170 (45.5%) | 5020 (54.0%)         | 4273 (46.0%) |
| <b>Mean age (sd)</b> | 57.7 (19.7)         | 53.6 (19.8)  | 54.5 (22.3)          | 50.3 (20.6)  |

The total amount of the follow-up time was equal to 80325.19 years, while the mean value was 4.90 years (median=5.5 years; Q1=1.9 years; Q3=8 years). The Hazard Ratio (HR) that compares MC with NMC for 1<sup>st</sup> hospital admission for all causes was 0.95 (95%CI 0.91 – 0.99) while HRs for planned and urgent 1<sup>st</sup> admissions were, respectively, 0.97 (95%CI 0.91 – 1.02) and 0.95 (95%CI 0.90 – 1.01) (Figure 1). Stratifying by gender, while in MC and NMC males hazards for 1<sup>st</sup> admissions seemed to be fairly the same, in females the HR for 1<sup>st</sup> planned admission was 0.95 (95%CI 0.88 – 1.02) and for urgent admission was 0.91 (95%CI 0.87 – 0.97) (fig. 2). When the analysis focused on specific causes of hospitalization, i.e., by ICD9-CM diagnosis blocks, the HR of 1<sup>st</sup> urgent admission for mental disorders in females was 0.39 (95%CI 0.18 – 0.82). Instead, an increased, albeit not statistically significant, HR for planned

admissions for mental disorders was also seen [HR 1.51 (95%CI 0.76 – 2.96)] (Figure 3). Again in females the HR for 1<sup>st</sup> urgent hospitalization caused by diseases of the genitourinary system was 0.74 (95%CI 0.49 – 1.11), whereas for planned admissions the HR was 1.03 (95%CI 0.82 – 1.31). Analysis regarding hospitalizations for diseases of the circulatory system and respiratory system showed a different pattern: HRs for circulatory system diseases were 1.15 (95%CI 0.98 – 1.35) for urgent hospitalization and 0.91 (95%CI 0.70 – 1.81) for planned admissions. HRs for respiratory system diseases were 0.95 (95%CI 0.74 – 1.21) for urgent and 0.63 (95%CI 0.42 – 0.94) for planned hospitalizations, respectively.

In males, the most relevant results refer to hospitalizations for diseases of the genitourinary system with the HR for 1<sup>st</sup> urgent admissions equal to 0.65 (95%CI 0.42 – 1.01) and for diseases of the circulatory system with the HR for 1<sup>st</sup> urgent hospitalization equal to 0.91 (95%CI 0.77 – 1.08) and for planned admissions equal to 1.37 (95%CI 1.08 – 1.74) (fig. 4).

Focusing on specific diagnosis, some relevant results emerged: in females, the HR for 1<sup>st</sup> urgent admission for psychosis (n.27; ICD9-CM 290-299) was equal to 0.15 (95%CI 0.05 – 0.51) while for acute respiratory infections (n.34; ICD9-CM 460-466) was 0.44 (95%CI 0.21 – 0.95). In males, the HR for 1<sup>st</sup> urgent admission for psychoses (n.21) was equal to 0.49 (95%CI 0.19 – 1.27), for other forms of heart disease (n. 197; ICD9-CM 420-429) was 0.72 (95%CI 0.54 – 0.97).

For what concerns multiple admissions for all causes (Table 2),

Table 2. Frequency distribution of all multiple hospital admissions (urgent+planned) by cohort and gender

| MULTIPLE ADMISSIONS | COHORT        | SEX | FREQ | %    |
|---------------------|---------------|-----|------|------|
| ≥ 2 admissions      | MICROAREA     | F   | 1318 | 23.9 |
|                     |               | M   | 1103 | 20.0 |
|                     | NOT MICROAREA | F   | 1732 | 31.4 |
|                     |               | M   | 1357 | 24.6 |

in females, the Odds Ratio (OR) was 0.93 (95% 0.89 – 0.98); in males was 0.98 (95%CI 0.93 – 1.03). For urgent hospitalizations (Table 3)

Table 3. Frequency distribution of multiple urgent hospital admissions by cohort and gender

| MULTIPLE ADMISSIONS | COHORT        | SEX | FREQ | %    |
|---------------------|---------------|-----|------|------|
| ≥ 2 admissions      | MICROAREA     | F   | 681  | 23.7 |
|                     |               | M   | 607  | 21.2 |
|                     | NOT MICROAREA | F   | 886  | 30.9 |
|                     |               | M   | 695  | 24.2 |

in females, the OR was 0.95 (95%CI 0.90 – 1.00); in males it was 1.03 (95%CI 0.96 – 1.09). Particularly relevant resulted the OR for multiple urgent admissions for fractures (ICD9-CM 800-829), in females, that was equal to 0.75 (95%CI 0.58 – 0.97). Analysing hazards for 1<sup>st</sup> access to ED, a slight reduction emerged for white codes, both in females and in males; the HRs were respectively 0.97 (95%CI 0.89 – 1.05) and 0.94 (95%CI 0.86 – 1.03). This reduction was found also for green codes but only in females: HR 0.94 (95%CI 0.87-1.00). For other priority codes, no risk differences emerged (data not shown). For what concerns multiple accesses to ED, again a minor reduction emerged for white codes, both in females and in males, the ORs were respectively equal to 0.97 (95%CI 0.91 – 1.02) and 0.97 (95%CI 0.92 – 1.03) and for green codes only in females results showed a risk reduction: OR 0.95 (95%CI: 0.91-1.00). No further significant results emerged for other priority codes (data not shown).

## Discussion

We focused hazards of 1<sup>st</sup> hospitalization, as main measurable outcomes, under the hypothesis that after the 1<sup>st</sup> hospital access patients are more likely to be involved in a controlled clinical follow-up and, therefore, the following hospital admissions may not be independent events. Our results show a slight reduction of 1<sup>st</sup> hospitalization hazard for all causes in MC and for urgent admissions in females, this reduction

1  
2  
3 appears to be more relevant. Coherently, hazards for 1<sup>st</sup> access to ED for the lowest  
4 priority access code, both in females and in males seem to be slightly decreased for  
5 white codes. This reduction was found also for green codes but only in females while  
6  
7 for other priority codes, no risk differences emerged. In literature interventions such  
8 patient education, needs assessment, telephonic support and follow-up have  
9  
10 effectively reduced hospital admissions. [26] A meta-analysis from Panagioti et al. [27]  
11 showed that interventions aimed to improve self-management support, reduced  
12 health service utilization, with no negative impact on patient health outcomes; robust  
13 evidence was found for respiratory and cardiovascular disorders. Coherently with  
14 these results, in our study, females belonging to the MC, showed a lower risk for acute  
15 respiratory infections, while in males of MC, a lower risk was found for 1<sup>st</sup> urgent  
16 hospitalization due to other forms of heart disease. However, it's for psychosis that  
17 we actually found our strongest evidence, particularly in females. The longitudinal  
18 SMILE study in the Netherlands (Groffen et al. 2008) [28] showed that those reporting  
19 material deprivation had a higher risk of physical and mental dysfunction. Randal et  
20 al [29] in a meta-analysis of the effect of early interventions for Psychosis found a  
21 positive effect in terms of hospitalization reduction. McFarlane and colleagues, [30]  
22 noted that admission rates for psychotic episodes were reduced by a community-  
23 wide program of early identification and intervention initiated in 2001.  
24  
25  
26  
27  
28  
29  
30  
31  
32  
33  
34  
35  
36  
37  
38  
39  
40  
41  
42  
43

44 Beyond the 1<sup>st</sup> hospitalization, multiple admissions represent a patient safety issue  
45 other than a public cost. [26] Socioeconomic status is strongly associated with  
46 hospital outcome measures and the available evidence shows that some multifaceted  
47 interventions were successful in reducing hospital readmissions. [31] In a randomized  
48 control trial, Naylor and colleagues [32] studied the effectiveness of nurse-centered  
49 discharge planning and follow-up intervention for subjects at higher risk of  
50 readmission, between 1992 and 1996. 24 weeks after hospital discharge, readmission  
51 was more frequent in the control group than in the intervention group of patients.  
52  
53  
54  
55  
56  
57  
58  
59  
60



1  
2  
3 Our results suggest that the HM project was effective in reducing multiple admissions  
4 for all causes (Table 2), in females, and particularly for fractures.  
5  
6

7  
8 For what concern the ED care services, there is an increased demand that affects  
9 countries where the population aging leads to individuals with different and more  
10 complex care needs. [33] Factors such as lack of access to other care or lack of  
11 awareness of available services or diagnostic and therapeutic pathways play a role  
12 and explain why demand for these services is persistently increasing. In addition,  
13 patients of low socioeconomic status do prefer hospital care, instead of primary care,  
14 because hospital cares are perceived as higher quality care and more convenient and  
15 accessible. [34] Our results show that during the multifaceted HM project, the hazards  
16 of 1<sup>st</sup> access to ED for white codes slightly decreased, both in females and in males.  
17  
18

19 Our study presents some limitations: our data derive from the administrative  
20 databases through an anonymous identifier, therefore, although not all residents  
21 were directly involved by the HM project, for our analysis all residents in the selected  
22 microareas were considered as participants in the HM project. This could have  
23 introduced a certain degree of misclassification with a likely underestimation of the  
24 effectiveness of the intervention. Moreover, between 2009 and 2012 the HM project  
25 was extended to three other microareas and, therefore, among whom we considered  
26 not participants, there were residents who were actually involved by the intervention.  
27 Again this could have contributed to underestimate the effectiveness of the  
28 intervention. Our results suggest that the project was more effective among females;  
29 according to what multi-professional teams reported, one possible explanation may  
30 be that it was easier to involve and females rather than males. However, this  
31 represents a limit in terms of results generalizability.  
32  
33  
34  
35  
36  
37  
38  
39  
40  
41  
42  
43  
44  
45  
46  
47  
48  
49  
50  
51  
52  
53  
54  
55

56  
57 Our study presents also some strengths: it involved two wide cohorts for a long  
58 follow-period and the use of administrative databases provided a complete picture of  
59  
60



1  
2  
3 subjects' access to health care facilities, diagnosis, therapies and procedures done in  
4 the study period. To our knowledge, this is one of few studies that evaluate the  
5 effectiveness of a social intervention in terms of impact on health service. In our view,  
6 this study may represent a starting point for a more comprehensive evaluation aimed  
7 to determine the impact of the HM project on the healthcare even in terms of costs,  
8 which represent a hot topic since sustainability of the public health service is matter  
9 of concern.  
10  
11  
12  
13  
14  
15  
16  
17  
18

## 19 **Conclusions**

20  
21  
22 Our results show that working on social determinants of health the burden on the  
23 health service can be controlled and reduced. There is evidence that during the  
24 follow-up period, there was a reduction of 1st urgent hospital admissions in the social  
25 intervention area, especially in females and for specific diagnosis such as psychosis.  
26 Also multiple admissions in the intervention group were decreased, again mainly in  
27 females and for specific diagnosis such as fractures.  
28  
29  
30  
31  
32  
33  
34  
35

## 36 **Acknowledgements**

37  
38  
39 The authors thank all the representatives of the "Habitat Microaree" project for their  
40 valuable work.  
41  
42  
43

## 44 **References**

- 45  
46  
47 1. Eurostat – Statistics Explained. Available from: [https://ec.europa.eu/eurostat/statistics-](https://ec.europa.eu/eurostat/statistics-explained/index.php/Glossary:Material_deprivation)  
48 [explained/index.php/Glossary:Material\\_deprivation](https://ec.europa.eu/eurostat/statistics-explained/index.php/Glossary:Material_deprivation)  
49  
50 2. European Commission. Employment, Social Affairs & Inclusion: Social protection & social inclusion.  
51 Available from: <https://ec.europa.eu/social/main.jsp?langId=en&catId=750>  
52  
53 3. Tøge AG, Bell R. Material deprivation and health: a longitudinal study. BMC Public Health. 2016 Aug  
54 8;16:747. doi: 10.1186/s12889-016-3327-z. Available from:  
55 <https://www.ncbi.nlm.nih.gov/pmc/articles/PMC4977874/>  
56  
57 4. Benach J, Yasui Y, Borrell C, Sáez M, Pasarin MI. Material deprivation and leading causes of death by  
58 gender: evidence from a nationwide small area study. J Epidemiol Community Health. 2001  
59 Apr;55(4):239-45. Available from: <https://jech.bmj.com/content/55/4/239.long>  
60

5. Benach J, Yasui Y, Borrell C, Pasarín MI, Martínez JM, Daponte A. The public health burden of material deprivation: excess mortality in leading causes of death in Spain. *Prev Med*. 2003 Mar;36(3):300-8. Available from: <https://www.sciencedirect.com/science/article/pii/S0091743502000142?via%3Dihub>
6. Coster JE, Turner JK, Bradbury D, Cantrell A. Why Do People Choose Emergency and Urgent Care Services? A Rapid Review Utilizing a Systematic Literature Search and Narrative Synthesis. *Acad Emerg Med*. 2017 Sep;24(9):1137-1149. doi: 10.1111/acem.13220. Epub 2017 Jun 19. Available from: <https://www.ncbi.nlm.nih.gov/pmc/articles/PMC5599959/>
7. Lowthian JA, Curtis AJ, Jolley DJ, Stoelwinder JU, McNeil JJ, Cameron PA. Demand at the emergency department front door: 10-year trends in presentations. *Med J Aust* 2012;196:128–32. . Available from: <https://onlinelibrary.wiley.com/doi/full/10.5694/mja11.10955?sid=nlm%3Apubmed>
8. Drummond AJ. No room at the inn: overcrowding in Ontario's emergency departments *CJEM* 2002;4:91–7. DOI 10.1017/s1481803500006187
9. Australian Institute of Health and Welfare. Australian Hospital Statistics 2009–10: Emergency Department Care and Elective Surgery Waiting Times. Canberra: AIHW, 2010. Available from: <https://www.aihw.gov.au/getmedia/1b305ffc-b7a4-4f80-aa66-d90614c5f8f4/12271.pdf.aspx?inline=true>
10. Nicholl J, Mason S. Return of the “corridors of shame”? *BMJ* 2013;346:F4343. DOI: <https://doi.org/10.1136/bmj.f4343>
11. Huntley A, Lasserson D, Wye L, et al. Which features of primary care affect unscheduled secondary care use? A systematic review. *BMJ Open* 2014. DOI: 10.1136/bmjopen-2013-004746 Available from: <https://bmjopen.bmj.com/content/bmjopen/4/5/e004746.full.pdf>
12. Brokamp C, Beck AF, Goyal NK, Ryan P, Greenberg JM, Hall ES. Material community deprivation and hospital utilization during the first year of life: an urban population-based cohort study. *Ann Epidemiol*. 2019 Feb;30:37-43. DOI: 10.1016/j.annepidem.2018.11.008. Available from: <https://www.sciencedirect.com/science/article/pii/S1047279718305453?via%3Dihub>
13. Gallio G, Cogliati Dezza MG. “La città che cura. Microaree e periferie della salute” Edizioni Alpha Beta Verlag. Merano 2018
14. Foot J., “La Repubblica dei matti. Franco Basaglia e la psichiatria radicale in Italia, 1961-1978”, Milano, Feltrinelli, 2014, Available from: <http://journals.openedition.org/diacronie/4210>
15. Panizon F. “Cari genitori, cari nonni, cari insegnanti, cari pediatri.” di Editore: Medico e Bambino, 2014, EAN: 9788890795299 ISBN: 8890795298
16. Demography in Figures. National Institute of Statistics. Available from: <http://demo.istat.it/>
17. Il programma Habitat Microaree Trieste. Linee di indirizzo progettuali e operative. Available from: [https://www.disuguaglianzedisalute.it/wp-content/uploads/2019/10/01allegato-2018\\_ASUITS\\_Linee-di-indirizzo-HM.pdf](https://www.disuguaglianzedisalute.it/wp-content/uploads/2019/10/01allegato-2018_ASUITS_Linee-di-indirizzo-HM.pdf)
18. Rosenbaum P.R., Rubin D.B. The central role of the propensity score in observational studies for causal effects. *Biometrika*. 1983a; 70:41–55. DOI:10.1146/annurev.publhealth.21.1.121. Available from: <https://doi.org/10.1093/biomet/70.1.41>
19. Austin PC. An Introduction to Propensity Score Methods for Reducing the Effects of Confounding in Observational Studies. *Multivariate Behav Res*. 2011; 46(3): 399–424. DOI: 10.1080/00273171.2011.568786. Available from: <https://www.tandfonline.com/doi/full/10.1080/00273171.2011.568786>
20. Rosenbaum PR. *Observational studies*. 2nd ed. New York, NY: Springer-Verlag; 2002. ISBN 978-1-4757-3692-2
21. Rosenbaum PR., Rubin DB. Constructing a control group using multivariate matched sampling methods that incorporate the propensity score. *The American Statistician*. 1985;39:33–38. Available from: <https://dash.harvard.edu/handle/1/3425853>
22. Parsons, LS. Reducing Bias in a Propensity Score Matched-Pair Sample Using Greedy Matching Techniques. *Proceedings of the Twenty-Six Annual SAS®Users Group International Conference*,

1  
2  
3  
4  
5  
6  
7  
8  
9  
10  
11  
12  
13  
14  
15  
16  
17  
18  
19  
20  
21  
22  
23  
24  
25  
26  
27  
28  
29  
30  
31  
32  
33  
34  
35  
36  
37  
38  
39  
40  
41  
42  
43  
44  
45  
46  
47  
48  
49  
50  
51  
52  
53  
54  
55  
56  
57  
58  
59  
60

Cary, NC: SAS Institute Inc., 2000; 214-226. Available from:

<https://support.sas.com/resources/papers/proceedings/proceedings/sugi26/p214-26.pdf>

23. Caranci N, Biggeri A, Grisotto L, Pacelli B, Spadea T, Costa G. The Italian deprivation index at census block level: definition, description and association with general mortality. *Epidemiol Prev.* 2010 Jul-Aug;34(4):167-76. Available from: [http://www.epiprev.it/articolo\\_scientifico/l%E2%80%99indice-di-deprivazione-italiano-livello-di-sezione-di-censimento-definizione-](http://www.epiprev.it/articolo_scientifico/l%E2%80%99indice-di-deprivazione-italiano-livello-di-sezione-di-censimento-definizione-)
24. Charlson ME, Pompei P, Ales KL, MacKenzie CR. A new method of classifying prognostic comorbidity in longitudinal studies: development and validation. *J Chronic Dis.* 1987;40(5):373-83. DOI: 10.1016/0021-9681(87)90171-8
25. Anatomical Therapeutic Chemical classification system. Available from: [https://www.whocc.no/atc\\_ddd\\_index/](https://www.whocc.no/atc_ddd_index/)
26. Kripalani S, Theobald CN, Anctil B, Vasilevskis EE. Reducing hospital readmission rates: current strategies and future directions. *Annu Rev Med.* 2014;65:471-85. DOI: 10.1146/annurev-med-022613-090415 Available from: <https://www.ncbi.nlm.nih.gov/pmc/articles/PMC4104507/>
27. Panagioti M, Richardson G, Small N, Murray E, Rogers A, Kennedy A, Newman S, Bower P. Self-management support interventions to reduce health care utilisation without compromising outcomes: a systematic review and meta-analysis. *BMC Health Serv Res.* 2014 Aug 27;14:356. DOI: 10.1186/1472-6963-14-356 Available from: <https://bmchealthservres.biomedcentral.com/articles/10.1186/1472-6963-14-356>
28. Groffen DA, Bosma H, van den Akker M, Kempen GI, van Eijk JT. Material deprivation and health-related dysfunction in older Dutch people: findings from the SMILE study. *Eur J Public Health.* 2008 Jun;18(3):258-63. DOI: 10.1093/eurpub/ckm119. Available from: <https://academic.oup.com/eurpub/article/18/3/258/519950>
29. Randall JR, Vokey S, Loewen H, Martens PJ, Brownell M, Katz A, Nickel NC, Burland E, Chateau D. A Systematic Review of the Effect of Early Interventions for Psychosis on the Usage of Inpatient Services. *Schizophr Bull.* 2015 Nov;41(6):1379-86. DOI: 10.1093/schbul/sbv016. Available from: <https://academic.oup.com/schizophreniabulletin/article/41/6/1379/2526024>
30. McFarlane WR, Susser E, McCleary R, Verdi M, Lynch S, Williams D, McKeague IW. Reduction in incidence of hospitalizations for psychotic episodes through early identification and intervention. *Psychiatr Serv.* 2014 Oct;65(10):1194-200. DOI: 10.1176/appi.ps.201300336. Available from: <https://ps.psychiatryonline.org/doi/full/10.1176/appi.ps.201300336>
31. Krumholz HM, Bernheim SM. Considering the role of socioeconomic status in hospital outcomes measures. *Ann Intern Med.* 2014;161(11):833-834. DOI: 10.7326/M14-2308. Available from: <https://annals.org/aim/fullarticle/1983521/considering-role-socioeconomic-status-hospital-outcomes-measures>
32. Naylor MD, Brooten D, Campbell R, Jacobsen BS, Mezey MD, Pauly MV, Schwartz JS. Comprehensive discharge planning and home follow-up of hospitalized elders: a randomized clinical trial. *JAMA.* 1999 Feb 17;281(7):613-20. DOI: 10.1001/jama.281.7.613. Available from: <https://jamanetwork.com/journals/jama/fullarticle/188788>
33. Joynt Maddox KE, Reidhead M, Hu J, Kind AJH, Zaslavsky AM, Nagasako EM, Nerenz DR. Adjusting for social risk factors impacts performance and penalties in the hospital readmissions reduction program. *Health Serv Res.* 2019 Apr;54(2):327-336. DOI: 10.1111/1475-6773.13133. Available from: <https://onlinelibrary.wiley.com/doi/full/10.1111/1475-6773.13133>

## Copyright

1  
2  
3 The Corresponding Author has the right to grant on behalf of all authors and does  
4 grant on behalf of all authors, an exclusive licence on a worldwide basis to the BMJ  
5 Publishing Group Ltd to permit this article (if accepted) to be published in BMJ  
6 editions and any other BMJ PGL products and sublicences such use and exploit all  
7 subsidiary rights.  
8  
9  
10  
11  
12  
13

### 14 **Competing interests declaration**

15  
16  
17 All authors have completed the ICMJE uniform disclosure form at  
18 [www.icmje.org/coi\\_disclosure.pdf](http://www.icmje.org/coi_disclosure.pdf) and declare: this retrospective cohort study was  
19 supported by a fund allocated by the local health authority of Trieste “Azienda  
20 Sanitaria Universitaria Integrata di Trieste” on 31<sup>st</sup> August 2016 (CUP  
21 E97B16000340002); no financial relationships with any organisations that might have  
22 an interest in the submitted work in the previous three years; no other relationships  
23 or activities that could appear to have influenced the submitted work.  
24  
25  
26  
27  
28  
29  
30  
31  
32  
33

### 34 **Contributors**

35  
36  
37 LC, FB, MGCD and FP conceived, designed and coordinated the study. MS, EA CE and  
38 FP collected data. MG, LC, VR defined the statistical analysis plan and performed the  
39 analysis. LC, MG, FB, MGCD and FP interpreted the results. LC and MG drafted the  
40 paper. FB, MGCD, MS, EA CE, FP and VR critically revised the manuscript.  
41  
42  
43  
44  
45  
46  
47

### 48 **Transparency statement**

49  
50 All authors declare that this manuscript is an honest, accurate, and transparent  
51 account of the study being reported; no relevant aspects of the study have been  
52 omitted. The study has been conducted as it was planned, with no relevant  
53 discrepancies.  
54  
55  
56  
57  
58

### 59 **Role of the funding source**

1  
2  
3 This retrospective cohort study was supported by a fund allocated by the local health  
4 authority of Trieste “Azienda Sanitaria Universitaria Integrata di Trieste” on 31<sup>st</sup>  
5 August 2016 (CUP E97B16000340002) through an *ad hoc* agreement with the  
6 University of Udine. Researchers acted independently from the funder and all authors  
7 had full access to all data (including statistical reports and tables) in the study and can  
8 take responsibility for the integrity of the data and the accuracy of the data analysis.  
9  
10  
11  
12  
13  
14  
15

### 16 17 **Data sharing statement**

18 All data relevant to the study are included in the article. No additional data available.  
19  
20  
21  
22

### 23 24 **Dissemination declaration**

25 The results of this retrospective cohort study were presented to public healthcare  
26 authorities, non-profit organisations, social housing, and citizens, during an *ad hoc*  
27 conference held in Trieste on 14 and 15 June 2018.  
28  
29  
30  
31  
32  
33

### 34 35 **Figure legends**

36  
37 **Figure 1.** HRs for 1st hospital admission; MC vs NMC. Analysis adjusted for age,  
38 Charlson and deprivation indexes  
39  
40  
41

42 **Figure 2.** HRs for 1st hospital admission; MC vs NMC by gender. Analysis adjusted for  
43 age, Charlson and deprivation indexes  
44  
45  
46

47 **Figure 3.** HRs for 1st hospital admission by ICD-9-CM blocks of diagnosis; MC vs NMC  
48 (females). Analysis adjusted for age, Charlson and deprivation indexes  
49  
50  
51

52 **Figure 4.** HRs for 1st hospital admission by ICD-9-CM blocks of diagnosis; MC vs NMC  
53 (males). Analysis adjusted for age, Charlson and deprivation indexes  
54  
55  
56  
57  
58  
59  
60

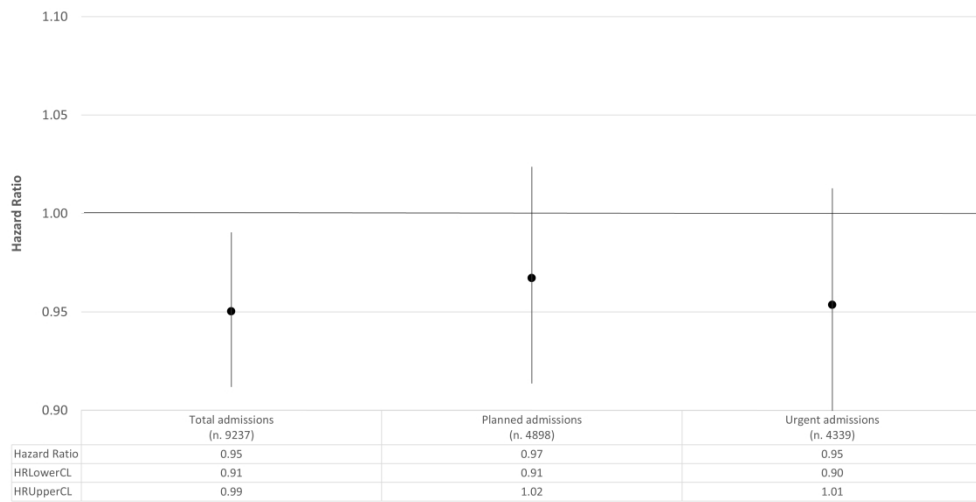

338x190mm (300 x 300 DPI)

1  
2  
3  
4  
5  
6  
7  
8  
9  
10  
11  
12  
13  
14  
15  
16  
17  
18  
19  
20  
21  
22  
23  
24  
25  
26  
27  
28  
29  
30  
31  
32  
33  
34  
35  
36  
37  
38  
39  
40  
41  
42  
43  
44  
45  
46  
47  
48  
49  
50  
51  
52  
53  
54  
55  
56  
57  
58  
59  
60

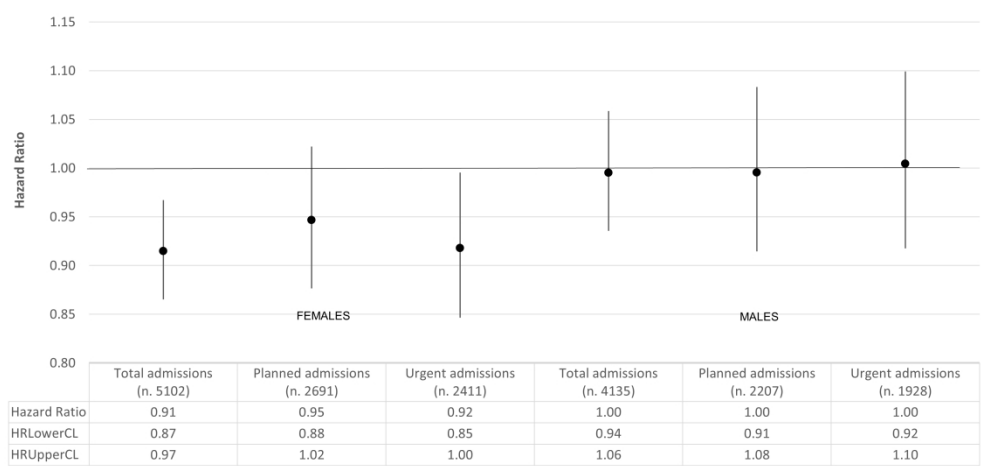

338x190mm (300 x 300 DPI)

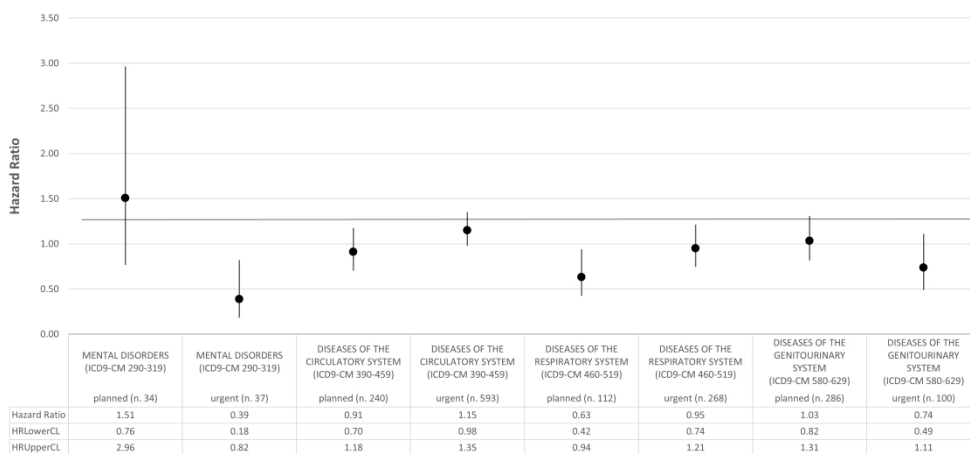

338x190mm (300 x 300 DPI)



1  
2  
3  
4  
5  
6  
7  
8  
9  
10  
11  
12  
13  
14  
15  
16  
17  
18  
19  
20  
21  
22  
23  
24  
25  
26  
27  
28  
29  
30  
31  
32  
33  
34  
35  
36  
37  
38  
39  
40  
41  
42  
43  
44  
45  
46  
47  
48  
49  
50  
51  
52  
53  
54  
55  
56  
57  
58  
59  
60

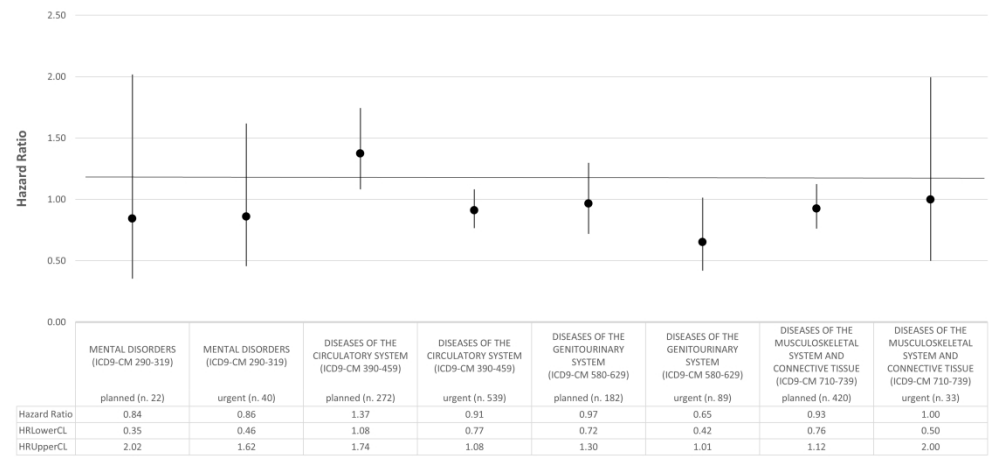

338x190mm (300 x 300 DPI)

STROBE Statement—Checklist of items that should be included in reports of *cohort studies*

|                              | Item No | Recommendation                                                                                                                                                                                                         |
|------------------------------|---------|------------------------------------------------------------------------------------------------------------------------------------------------------------------------------------------------------------------------|
| <b>Title and abstract</b>    | 1       | (a) Indicate the study's design with a commonly used term in the title or the abstract<br><b>Page 1</b>                                                                                                                |
|                              |         | (b) Provide in the abstract an informative and balanced summary of what was done and what was found<br><b>Page 2</b>                                                                                                   |
| <b>Introduction</b>          |         |                                                                                                                                                                                                                        |
| Background/rationale         | 2       | Explain the scientific background and rationale for the investigation being reported<br><b>Page 3</b>                                                                                                                  |
| Objectives                   | 3       | State specific objectives, including any prespecified hypotheses<br><b>Pages 5-6</b>                                                                                                                                   |
| <b>Methods</b>               |         |                                                                                                                                                                                                                        |
| Study design                 | 4       | Present key elements of study design early in the paper<br><b>Pages 6-8</b>                                                                                                                                            |
| Setting                      | 5       | Describe the setting, locations, and relevant dates, including periods of recruitment, exposure, follow-up, and data collection<br><b>Pages 6-7</b>                                                                    |
| Participants                 | 6       | (a) Give the eligibility criteria, and the sources and methods of selection of participants. Describe methods of follow-up<br><b>Pages 6-7</b>                                                                         |
|                              |         | (b) For matched studies, give matching criteria and number of exposed and unexposed<br><b>Page 6 for matching criteria and Results, page 8 for number of exposed and unexposed (participants and not participants)</b> |
| Variables                    | 7       | Clearly define all outcomes, exposures, predictors, potential confounders, and effect modifiers. Give diagnostic criteria, if applicable<br><b>Page 7</b>                                                              |
| Data sources/<br>measurement | 8*      | For each variable of interest, give sources of data and details of methods of assessment (measurement). Describe comparability of assessment methods if there is more than one group<br><b>Pages 6-8</b>               |
| Bias                         | 9       | Describe any efforts to address potential sources of bias<br><b>Pages 7-8</b>                                                                                                                                          |
| Study size                   | 10      | Explain how the study size was arrived at<br><b>Page 6</b>                                                                                                                                                             |
| Quantitative variables       | 11      | Explain how quantitative variables were handled in the analyses. If applicable, describe which groupings were chosen and why<br><b>Pages 7-8</b>                                                                       |
| Statistical methods          | 12      | (a) Describe all statistical methods, including those used to control for confounding<br><b>Pages 7-8</b>                                                                                                              |
|                              |         | (b) Describe any methods used to examine subgroups and interactions <b>Pages 7-8</b>                                                                                                                                   |
|                              |         | (c) Explain how missing data were addressed <b>Not applicable</b>                                                                                                                                                      |
|                              |         | (d) If applicable, explain how loss to follow-up was addressed <b>Not applicable</b>                                                                                                                                   |
|                              |         | (e) Describe any sensitivity analyses <b>Not applicable</b>                                                                                                                                                            |
| <b>Results</b>               |         |                                                                                                                                                                                                                        |
| Participants                 | 13*     | (a) Report numbers of individuals at each stage of study—eg numbers potentially                                                                                                                                        |

|                          |     |                                                                                                                                                                                                                                                                                                                            |
|--------------------------|-----|----------------------------------------------------------------------------------------------------------------------------------------------------------------------------------------------------------------------------------------------------------------------------------------------------------------------------|
|                          |     | eligible, examined for eligibility, confirmed eligible, included in the study, completing follow-up, and analysed <a href="#">Page 8</a>                                                                                                                                                                                   |
|                          |     | (b) Give reasons for non-participation at each stage <a href="#">Not applicable</a>                                                                                                                                                                                                                                        |
|                          |     | (c) Consider use of a flow diagram <a href="#">Not applicable</a>                                                                                                                                                                                                                                                          |
| Descriptive data         | 14* | (a) Give characteristics of study participants (eg demographic, clinical, social) and information on exposures and potential confounders <a href="#">Not applicable</a>                                                                                                                                                    |
|                          |     | (b) Indicate number of participants with missing data for each variable of interest <a href="#">Not applicable</a>                                                                                                                                                                                                         |
|                          |     | (c) Summarise follow-up time (eg, average and total amount) <a href="#">Page 8</a>                                                                                                                                                                                                                                         |
| Outcome data             | 15* | Report numbers of outcome events or summary measures over time <a href="#">Tables 2 and 3 pages 9 and 10</a>                                                                                                                                                                                                               |
| Main results             | 16  | (a) Give unadjusted estimates and, if applicable, confounder-adjusted estimates and their precision (eg, 95% confidence interval). Make clear which confounders were adjusted for and why they were included <a href="#">See page 8, for list of confounders and Figures 1 to 4 for adjusted estimates and confounders</a> |
|                          |     | (b) Report category boundaries when continuous variables were categorized <a href="#">Not applicable</a>                                                                                                                                                                                                                   |
|                          |     | (c) If relevant, consider translating estimates of relative risk into absolute risk for a meaningful time period <a href="#">Not applicable</a>                                                                                                                                                                            |
| Other analyses           | 17  | Report other analyses done—eg analyses of subgroups and interactions, and sensitivity analyses <a href="#">Not applicable</a>                                                                                                                                                                                              |
| <b>Discussion</b>        |     |                                                                                                                                                                                                                                                                                                                            |
| Key results              | 18  | Summarise key results with reference to study objectives <a href="#">Pages 10-13</a>                                                                                                                                                                                                                                       |
| Limitations              | 19  | Discuss limitations of the study, taking into account sources of potential bias or imprecision. Discuss both direction and magnitude of any potential bias <a href="#">Page 12</a>                                                                                                                                         |
| Interpretation           | 20  | Give a cautious overall interpretation of results considering objectives, limitations, multiplicity of analyses, results from similar studies, and other relevant evidence <a href="#">Discussion, pages 12 and Conclusions, page 13.</a>                                                                                  |
| Generalisability         | 21  | Discuss the generalisability (external validity) of the study results <a href="#">Page 12</a>                                                                                                                                                                                                                              |
| <b>Other information</b> |     |                                                                                                                                                                                                                                                                                                                            |
| Funding                  | 22  | Give the source of funding and the role of the funders for the present study and, if applicable, for the original study on which the present article is based <a href="#">Role of the funding source, page 14</a>                                                                                                          |

\*Give information separately for exposed and unexposed groups.

**Note:** An Explanation and Elaboration article discusses each checklist item and gives methodological background and published examples of transparent reporting. The STROBE checklist is best used in conjunction with this article (freely available on the Web sites of PLoS Medicine at <http://www.plosmedicine.org/>, Annals of Internal Medicine at <http://www.annals.org/>, and Epidemiology at <http://www.epidem.com/>). Information on the STROBE Initiative is available at <http://www.strobe-statement.org>.

# BMJ Open

## Measuring the impact of a social programme on healthcare: A 10-year retrospective cohort study in Trieste, Italy

|                                 |                                                                                                                                                                                                                                                                                                                                                                                                                                                                                                                                                                                                                                                                                                                                                                                                                            |
|---------------------------------|----------------------------------------------------------------------------------------------------------------------------------------------------------------------------------------------------------------------------------------------------------------------------------------------------------------------------------------------------------------------------------------------------------------------------------------------------------------------------------------------------------------------------------------------------------------------------------------------------------------------------------------------------------------------------------------------------------------------------------------------------------------------------------------------------------------------------|
| Journal:                        | <i>BMJ Open</i>                                                                                                                                                                                                                                                                                                                                                                                                                                                                                                                                                                                                                                                                                                                                                                                                            |
| Manuscript ID                   | bmjopen-2020-036857.R1                                                                                                                                                                                                                                                                                                                                                                                                                                                                                                                                                                                                                                                                                                                                                                                                     |
| Article Type:                   | Original research                                                                                                                                                                                                                                                                                                                                                                                                                                                                                                                                                                                                                                                                                                                                                                                                          |
| Date Submitted by the Author:   | 18-May-2020                                                                                                                                                                                                                                                                                                                                                                                                                                                                                                                                                                                                                                                                                                                                                                                                                |
| Complete List of Authors:       | Castriotta, Luigi; Azienda Sanitaria Universitaria Integrata di Udine, Istituto di Igiene ed Epidemiologia Clinica<br>Giangreco, Manuela; Istituto di Ricovero e Cura a Carattere Scientifico materno infantile Burlo Garofolo<br>Cogliati-Dezza, Maria Grazia; Azienda Sanitaria Universitaria Integrata di Trieste<br>Spanò, Marco; Azienda Sanitaria Universitaria Integrata di Trieste<br>Atrigna, Enrico; Azienda Sanitaria Universitaria Integrata di Trieste<br>Ehrenfreund, Claudia; Azienda Sanitaria Universitaria Integrata di Trieste<br>Rosolen, Valentina; Istituto di Ricovero e Cura a Carattere Scientifico materno infantile Burlo Garofolo<br>Paoletti, Flavio; Azienda Sanitaria Universitaria Integrata di Trieste<br>Barbone, Fabio; Università degli Studi di Udine, Department Medical Area - DAME |
| <b>Primary Subject Heading</b>: | Public health                                                                                                                                                                                                                                                                                                                                                                                                                                                                                                                                                                                                                                                                                                                                                                                                              |
| Secondary Subject Heading:      | Epidemiology                                                                                                                                                                                                                                                                                                                                                                                                                                                                                                                                                                                                                                                                                                                                                                                                               |
| Keywords:                       | PUBLIC HEALTH, EPIDEMIOLOGY, SOCIAL MEDICINE                                                                                                                                                                                                                                                                                                                                                                                                                                                                                                                                                                                                                                                                                                                                                                               |
|                                 |                                                                                                                                                                                                                                                                                                                                                                                                                                                                                                                                                                                                                                                                                                                                                                                                                            |

SCHOLARONE™  
Manuscripts



I, the Submitting Author has the right to grant and does grant on behalf of all authors of the Work (as defined in the below author licence), an exclusive licence and/or a non-exclusive licence for contributions from authors who are: i) UK Crown employees; ii) where BMJ has agreed a CC-BY licence shall apply, and/or iii) in accordance with the terms applicable for US Federal Government officers or employees acting as part of their official duties; on a worldwide, perpetual, irrevocable, royalty-free basis to BMJ Publishing Group Ltd ("BMJ") its licensees and where the relevant Journal is co-owned by BMJ to the co-owners of the Journal, to publish the Work in this journal and any other BMJ products and to exploit all rights, as set out in our [licence](#).

The Submitting Author accepts and understands that any supply made under these terms is made by BMJ to the Submitting Author unless you are acting as an employee on behalf of your employer or a postgraduate student of an affiliated institution which is paying any applicable article publishing charge ("APC") for Open Access articles. Where the Submitting Author wishes to make the Work available on an Open Access basis (and intends to pay the relevant APC), the terms of reuse of such Open Access shall be governed by a Creative Commons licence – details of these licences and which [Creative Commons](#) licence will apply to this Work are set out in our licence referred to above.

Other than as permitted in any relevant BMJ Author's Self Archiving Policies, I confirm this Work has not been accepted for publication elsewhere, is not being considered for publication elsewhere and does not duplicate material already published. I confirm all authors consent to publication of this Work and authorise the granting of this licence.

**TITLE**

Measuring the impact of a social programme on healthcare: A 10-year retrospective cohort study in Trieste, Italy

**CORRESPONDING AUTHOR**

Luigi Castriotta. Azienda Sanitaria Universitaria Integrata di Udine. Via Pozzuolo 330, 33100 Udine. Italy. [luigi.castriotta@asuiud.sanita.fvg.it](mailto:luigi.castriotta@asuiud.sanita.fvg.it)

**AUTHORS**

1. Luigi Castriotta (*corresponding author*). Azienda Sanitaria Universitaria Integrata di Udine. Via Pozzuolo 330, 33100 Udine. Italy. [luigi.castriotta@asuiud.sanita.fvg.it](mailto:luigi.castriotta@asuiud.sanita.fvg.it)
2. Manuela Giangreco. Institute for Maternal and Child Health - IRCCS “Burlo Garofolo” – Trieste. Via dell'Istria, 65, 34137 Trieste. Italy [manuela.giangreco@burlo.trieste.it](mailto:manuela.giangreco@burlo.trieste.it)
3. Maria Grazia Cogliati-Dezza. Azienda Sanitaria Universitaria Integrata di Trieste. Via Giovanni Sai 7, 34128 Trieste. Italy. [mariagrazia.cogliati@gmail.com](mailto:mariagrazia.cogliati@gmail.com)
4. Marco Spanò. Azienda Sanitaria Universitaria Integrata di Trieste. Via Giovanni Sai 7, 34128 Trieste. Italy. [marco.spano@asugi.sanita.fvg.it](mailto:marco.spano@asugi.sanita.fvg.it)
5. Enrico Atrigna. Azienda Sanitaria Universitaria Integrata di Trieste. Via Giovanni Sai 7, 34128 Trieste. Italy. [enrico.atrigna@asugi.sanita.fvg.it](mailto:enrico.atrigna@asugi.sanita.fvg.it)
6. Claudia Ehrenfreund. Azienda Sanitaria Universitaria Integrata di Trieste. Via Giovanni Sai 7, 34128 Trieste. Italy. [claudia.ehrenfreund@asugi.sanita.fvg.it](mailto:claudia.ehrenfreund@asugi.sanita.fvg.it)
7. Valentina Rosolen. Institute for Maternal and Child Health - IRCCS “Burlo Garofolo” – Trieste. Via dell'Istria, 65, 34137 Trieste. Italy [valentina.rosolen@burlo.trieste.it](mailto:valentina.rosolen@burlo.trieste.it)

1  
2  
3 8. Flavio Paoletti. Azienda Sanitaria Universitaria Integrata di Trieste. Via  
4 Giovanni Sai 7, 34128 Trieste. Italy. [flavio.paoletti@asugi.sanita.fvg.it](mailto:flavio.paoletti@asugi.sanita.fvg.it)  
5  
6

7 9. Fabio Barbone. University of Udine, Department of Medicine, DAME, Via  
8 Colugna, 50, 33100 Udine. Italy. [fabio.barbone@uniud.it](mailto:fabio.barbone@uniud.it)  
9  
10  
11  
12  
13  
14

## 15 **ABSTRACT**

### 16 **Objectives**

17  
18  
19  
20  
21  
22 Poor social conditions are strong determinants of poor health but positive health and  
23 healthcare changes caused by social interventions are difficult to demonstrate. In  
24 2006, in Trieste (Italy), a social intervention known as “Habitat Microaree” (HM)  
25 project was implemented in eight deprived neighbourhoods. In 2016, an  
26 observational study was launched to assess the impact of the HM project on  
27 healthcare.  
28  
29  
30  
31  
32  
33  
34

### 35 **Design**

36  
37  
38  
39 Retrospective cohort study.  
40  
41

### 42 **Setting**

43  
44  
45 The eight geographically defined neighbourhoods of Trieste involved in the 2006 HM  
46 project, accounting for a total of 11,380 residents.  
47  
48  
49

### 50 **Participants**

51  
52  
53 Participants were all residents in the intervention areas. By means of a propensity  
54 score based on deprivation index, age, sex, Charlson index and drug utilization, a non-  
55 participating, comparison group was defined.  
56  
57  
58  
59  
60

## Intervention

The community-based intervention consisted of facilitating access to social services and outpatient healthcare facilities, coordinating intersectoral public services and specifically planning hospital discharge. These services were not provided in other areas of the city.

## Outcome measures

Hospital admissions and Emergency Department access.

## Results

We followed 16,256 subjects between 2008 and 2015. Living in microareas was associated with a hazard ratio (HR) for 1<sup>st</sup> hospital admission, for all causes, of 0.95 (95% CI: 0.91 – 0.99); while the HR for urgent admissions in females was 0.91 (95%CI 0.87 – 0.97). The HR for psychiatric disorders, in females, was 0.39 (95%CI 0.18 – 0.82); in particular, the HR for psychosis was 0.15 (95%CI 0.05 – 0.51). The HR for acute respiratory diseases in females was 0.44 (95% CI: 0.21 – 0.95). In males, the HR for genitourinary diseases and heart diseases, were 0.65 (95% CI: 0.42 – 1.01) and 0.72 (95% CI: 0.54 – 0.97), respectively. Concerning multiple admissions, the odds ratio (OR) for fractures in females was 0.75 (95% CI: 0.57 – 0.97).

## Conclusion

In the study period, the effects on healthcare appear evident, especially in females.

## STRENGTHS AND LIMITATIONS OF THIS STUDY

- This study involved a large cohort for a long follow-period and the use of administrative databases as a data source, provided a complete picture of the



1  
2  
3 subjects' access to health care facilities, diagnoses, therapies and treatments in  
4 the study period.  
5  
6

- 7 • To our knowledge, this is one of few studies that evaluate the effectiveness of  
8 a social intervention in terms of impact on health service.  
9
- 10 • Our data derive from the administrative databases through an anonymous  
11 identifier, therefore, although not all residents were directly involved in the HM  
12 project, in our analysis all residents in the selected microareas were considered  
13 as participants in the HM project.  
14
- 15 • Between 2009 and 2012 the HM project was extended to a further three  
16 microareas. Therefore, a number of residents initially considered as non-  
17 participants, were subsequently involved in the intervention.  
18
- 19 • Our results suggest that the HM project was more effective among females.  
20 This represents a limitation to the generalizability of the results.  
21  
22  
23  
24  
25  
26  
27  
28  
29  
30  
31  
32  
33

## 34 **ARTICLE**

### 35 **Introduction**

36  
37  
38  
39  
40 Material deprivation is an outcome-based measure of material well-being and  
41 material deprivation rate is an indicator in the European Union statistics on income,  
42 and living conditions (EU-SILC), adopted by the Social Protection Committee and used  
43 by the European Commission to set targets for the Member States. [1-2] Townsend  
44 considered the material deprivation as the "inability of living a decent life". [3] He  
45 stated "People can be said to be deprived if they lack the types of diet, clothing,  
46 housing, environmental, educational, working and social conditions, activities and  
47 facilities which are customary, or at least widely encouraged or approved, in the  
48 societies to which they belong. They fall below standards of living which either can be  
49 shown to be widespread in fact or are socially accepted or institutionalized". [4] Sen,  
50  
51  
52  
53  
54  
55  
56  
57  
58  
59  
60

1  
2  
3 in 1983, agreed with Townsend on the concepts of “shame” and “inability to live a  
4 decent life with dignity” to explain the concept of material deprivation. [5] To date,  
5 authors converge towards a definition of material deprivation as “exclusion from the  
6 minimum acceptable way of life in one’s own society because of inadequate  
7 resources” [6,7,8,9,10,11] or “the lack of socially perceived necessities”. [7,12]  
8 Indeed, there is mounting evidence of an association between material deprivation  
9 and poor health conditions, in particularly with regards to chronic diseases whose risk  
10 increases over the life course. [13] A Spanish nationwide small area study aimed to  
11 investigate the excess of mortality by first 10 leading causes associated to deprivation  
12 indexes, found that the higher the deprivation levels the higher the mortality risks,  
13 although this relation varied by gender and region. According to the authors, these  
14 findings support the idea that material deprivation causes health inequality through  
15 two mechanisms: by increasing the general susceptibility to diseases that lead to an  
16 excess of mortality for a wide range of causes; and through a set of more specific  
17 factors that lead to an excess of mortality for gender-specific causes. [14,15]

18 Furthermore, it has been shown that there is an increasing trend in annual access to  
19 emergency and urgent care in developed countries.[16] Studies from the United  
20 States, Canada, the United Kingdom, and Australia consistently reported demand for  
21 emergency department (ED) care increased from 3% to 6% per year. Between 1996  
22 and 2006, in the United States, accesses to ED rose from 34.1% to 40.5% while in  
23 United Kingdom demand has more than doubled from 6.8 million ED accesses in 1966  
24 to 14.3 million in 2012. [17-20] However, according to the available studies, this  
25 phenomenon is attributable mainly to people with primary care problems who make  
26 improper use of emergency and urgent care services to access care. Relevant  
27 proportions of patients, ranging from 10% to 60%, could be managed using services  
28 with lower and more appropriate care, and more accessible primary care could  
29 reduce unplanned secondary care use. [16, 21] Material deprivation is one of the  
30  
31  
32  
33  
34  
35  
36  
37  
38  
39  
40  
41  
42  
43  
44  
45  
46  
47  
48  
49  
50  
51  
52  
53  
54  
55  
56  
57  
58  
59  
60

1  
2  
3 factors that affect the way health services are used; in a population-based cohort  
4 study, Brokamp et al. [22] found that a 10% increase in deprivation level caused a  
5 1.03-fold increase (95% CI 1.03-1.04) in length of hospital stay and a 1.02-fold increase  
6 (95% CI: 1.01-1.04) in risk of hospital utilization. Raphael [23] gave the definition of  
7 social determinants of health as “economic and social conditions that shape the  
8 health of individuals, communities and jurisdictions as a whole”. Gender, education,  
9 income, housing, employment and access to healthcare shown an association with ill  
10 health.

11  
12 Strong associations between social determinants and several health outcomes in  
13 different populations have been well documented as reported in Braveman et al..[24]  
14 Collaboration between public health workers and clinicians, developing health-  
15 promotion strategies, can improve the health outcomes for socially disadvantaged  
16 populations and can add more understanding of the mechanisms by which social  
17 determinants influence health. [25,26]

18  
19 Despite the compelling evidence on the social determinant of health, very few large  
20 community interventions have been conducted worldwide. The landmark health  
21 initiatives conducted in Trieste over the past 50 years, afford a comprehensive  
22 approach to these issues, along with mental and paediatric health. [27-29] Trieste lies  
23 at the extreme northeast of Italy, close to the borders with Austria and Slovenia. The  
24 area is mostly urban (inhabitants: 234,493; area: 212 km<sup>2</sup>; density: 1,107/km<sup>2</sup>; foreign  
25 nationality: 10% in 2019). [30]

26  
27 In the last census conducted in Italy by the National Institute of Statistics in 2011,  
28 27.6% of people residing in Trieste were over 65 years of age (vs 20.5% in Italy) and  
29 life expectancy at birth was 79 years for males and 83.6 years for females (vs 79.5 for  
30 males and 84.4 for females in Italy). In Trieste, the mortality rate for all causes was  
31 14.5 per 1000 inhabitants (vs 10.0 per 1000 inhabitants in Italy) and the birth rate was  
32 7.3 per 1000 inhabitants (vs 9.2 per 1000 inhabitants in Italy). Fifty percent of the  
33  
34  
35  
36  
37  
38  
39  
40  
41  
42  
43  
44  
45  
46  
47  
48  
49  
50  
51  
52  
53  
54  
55  
56  
57  
58  
59  
60

1  
2  
3 population was not in the labour force (vs 49.2 in Italy) and 4.7% were looking for a  
4 job (vs 5.8% in Italy); 52.7% of residents in Trieste had a low education level (vs 58.7%  
5 in Italy), 32.0% had a high school diploma (vs 30.2% in Italy) and 16.3% had a university  
6 degree or higher (vs 11.5% in Italy). [30]  
7  
8  
9  
10

11 The city has been, and still is, rich in contrasts and owes much of its centuries-old  
12 tradition of multilingualism and multiculturalism to its role as a port which, however,  
13 has also brought inequalities in the physical and social milieu and in health. In  
14 particular, at the beginning of the new millennium, an increase in population aging, a  
15 prevalence of chronic conditions and polypharmacy, and inequalities in the  
16 distribution of risk factors and welfare reliance, including public housing, resulted in  
17 uncontrolled access to care explainable more in terms of social determinants and  
18 uncoordinated provision of medical care than of acute clinical progression demand.  
19 In particular, in Trieste, there are well defined neighbourhoods known as  
20 “Microaree”, with 500 up to 2500 inhabitants, characterized by a high prevalence of  
21 social housing, economic and social hardship and poor environment quality.  
22  
23  
24  
25  
26  
27  
28  
29  
30  
31  
32  
33  
34

35 To improve the health status and the social capital of these deprived communities, in  
36 2006, the local health authorities, in conjunction with the voluntary and public social  
37 housing sectors and private citizens, implemented a proactive joint intervention  
38 program called “Habitat Microaree” (HM). The HM project started on 1 January 2006  
39 in eight “Microaree” and was designed to act both at the individual level, ensuring  
40 proper access to health facilities and social services, as well as improving the  
41 coordination of services; and at the community level, supporting hospital discharges.  
42 The HM project was conceived as a joint intervention delivered in people's life setting  
43 and designed to act on multiple levels, health, social and housing, through a paradigm  
44 shift: services no longer as a set of a-priori defined activities, but co-produced with  
45 people in order to engage them. [31]  
46  
47  
48  
49  
50  
51  
52  
53  
54  
55  
56  
57  
58  
59  
60

1  
2  
3 In 2016, the University of Udine set up a retrospective cohort study to evaluate the  
4 effectiveness of this community-based social intervention, in terms of reduction of  
5 urgent admissions to both hospital and the emergency department, comparing  
6 subjects who lived in the microarea with subjects who lived in the neighbouring non-  
7 microarea quarters of Trieste. In conjunction and in coordination with this study, the  
8 University of Turin worked on the analysis of the social capital generated by the  
9 intervention in relation to the health status. Here we present the results of the  
10 retrospective cohort study.  
11  
12  
13  
14  
15  
16  
17  
18  
19

## 20 21 **Methods**

22  
23  
24 The HM project started on 1 January 2006 in eight “Microaree” of Trieste accounting  
25 for a total of 11,380 residents. Eight multi-professional teams were set up, one for  
26 each microarea, consisting of experts in continuum of care from the local health  
27 district, social workers from the municipality of Trieste and agents from the social  
28 housing agency. [31] The HM activities to support the health and rights of citizens  
29 were linked to 4 intervention areas: (a) assessment of the priority health problems of  
30 the people residing in each microarea; (b) optimization of interventions in support of  
31 home healthcare to prevent institutionalization and improper hospitalization; (c)  
32 promotion of collaboration between different institutions providing services to the  
33 same individual and on the same territory, through the active participation of the  
34 inhabitants; and (d) fostering an active and participatory community. The close  
35 interrelationship and interdependence between socio-economic factors, individual  
36 behaviours, the context of life and health make the reality of the Microaree extremely  
37 difficult to represent by classifying activities univocally in relation to specific  
38 objectives and areas of intervention. Table 1 shows some examples of the  
39 interventions delivered in the eight “Microaree” of Trieste.  
40  
41  
42  
43  
44  
45  
46  
47  
48  
49  
50  
51  
52  
53  
54  
55  
56  
57  
58  
59  
60

Table 1. Some Examples of the interventions of HM project

| Aim                                                                                                     | Purpose                                                                                                                                | Activity areas (examples)                                                                                                                                                                                                                                                                                                                     | Target                                               |
|---------------------------------------------------------------------------------------------------------|----------------------------------------------------------------------------------------------------------------------------------------|-----------------------------------------------------------------------------------------------------------------------------------------------------------------------------------------------------------------------------------------------------------------------------------------------------------------------------------------------|------------------------------------------------------|
| Activities mainly aimed at <b>health</b> promotion, focusing primarily on health determinants.          | <b>Fostering the exercise of the right to citizenship</b>                                                                              | Providing orientation, assistance and support to families and individuals for access to health and social services and the fulfilment of procedures related to housing, employment and income support (simplify access to Offices and Agencies, Project In-town help desk, work placement grants, community service or socially useful work). | Adults, elderly, disabled, community                 |
|                                                                                                         | <b>Contributing to the respect of children's right to education</b>                                                                    | Accompaniment to school.<br>School support also for children with Special educational needs (SENs), Learning disabilities (LDs), (strengthen engagement with teachers and school institutions, after-school childcare services).                                                                                                              | Children                                             |
|                                                                                                         | <b>Developing community empowerment:</b><br><b>Fostering inter-generational and inter-ethnic knowledge and coexistence/integration</b> | Organization of recreational and cultural group, community and inter-generational activities (libraries, reading and poetry; shows and movies; singing and music; old-fashioned and new games; excursions, exhibitions; parties and special events; language courses, courses on computer and cell phone use, arts and crafts courses; etc.). | Children, adults, elderly, disabled, community       |
|                                                                                                         | <b>Optimizing the use of collective resources</b>                                                                                      | (Involvement of asylum seekers and refugees in MA activities, as part of the convention with the ICS)                                                                                                                                                                                                                                         | Adults                                               |
|                                                                                                         | <b>Optimizing the use of collective resources</b>                                                                                      | Collection and distribution of unsold food items (food bank).<br>Collection, maintenance, and distribution of toys, clothes, furniture, appliances, home devices (flea markets, charity shops) and other materials.<br><br>Courses on how to re-use and recycle materials.                                                                    | Community<br><br>Children, adults, elderly, disabled |
| Activities mainly aimed at <b>primary prevention</b> to reduce the occurrence of diseases and injuries. | <b>Combating isolation and loneliness</b>                                                                                              | Ensure accessibility of Microarea offices and/or other community spaces for group and community activities.<br>Home visits and individual meetings.                                                                                                                                                                                           | Children, adults, elderly, disabled                  |
|                                                                                                         |                                                                                                                                        | Self-help groups (anxiety, violence, etc.).                                                                                                                                                                                                                                                                                                   | Adults, elderly, disabled                            |

|                                                                                                                                                                                                                        |                                                                                                      |                                                                                                                                                                                                                                                                                                                                                                                                                                                                                                                                                                                                                                                                                              |                                                       |
|------------------------------------------------------------------------------------------------------------------------------------------------------------------------------------------------------------------------|------------------------------------------------------------------------------------------------------|----------------------------------------------------------------------------------------------------------------------------------------------------------------------------------------------------------------------------------------------------------------------------------------------------------------------------------------------------------------------------------------------------------------------------------------------------------------------------------------------------------------------------------------------------------------------------------------------------------------------------------------------------------------------------------------------|-------------------------------------------------------|
|                                                                                                                                                                                                                        | <p><b>Promoting the adoption of sustainable healthy lifestyles and encouraging socialization</b></p> | <p>Organize meetings and classes to discuss issues related to lifestyles and <b>health risk factors</b>, also in collaboration with other local authority agencies, such as the Department of Prevention, Mental Health and Addiction Services and Voluntary Associations (AA, Hiperyon, etc.).</p> <p>Offer opportunities for intergenerational <b>recreational, physical and sport activities</b> (play and sport for children and teenagers, light exercise, dancing, walks, <i>Group on the move</i> project, self-defence courses, etc.).</p> <p>Cooking courses.</p> <p>Care of the community garden.</p> <p>Preparation and consumption of meals (social breakfasts and lunches).</p> | <p>Children, adults, elderly, disabled, community</p> |
|                                                                                                                                                                                                                        | <p><b>Supporting vaccination campaigns</b></p>                                                       | <p>Raise the awareness of individuals, families and the community, also by organizing dedicated meetings.</p>                                                                                                                                                                                                                                                                                                                                                                                                                                                                                                                                                                                | <p>Children, adults, elderly, disabled, community</p> |
| <p>Activities primarily aimed at <b>secondary prevention</b> for early detection of diseases.</p>                                                                                                                      | <p><b>Improving access to regional screenings</b></p>                                                | <p>Raise the awareness of individuals and the community, also by organizing dedicated meetings.</p>                                                                                                                                                                                                                                                                                                                                                                                                                                                                                                                                                                                          | <p>Adults, elderly, disabled, community</p>           |
| <p>Activities mainly aimed at <b>tertiary prevention</b> to avoid the onset of complications or relapses following an illness and/or at <b>quaternary prevention</b> to avoid the effects of hyper-medicalization.</p> | <p><b>Promoting home-care for vulnerable people, avoiding institutionalization</b></p>               | <p>Provision of support and assistance to carry out day to day activities at home and outside home.</p> <p>Promote assisted cohousing and the development of supportive housing solutions.</p> <p>Provide information, orientation and support to Care Givers (Alzheimer group...).</p>                                                                                                                                                                                                                                                                                                                                                                                                      | <p>Adults, elderly, disabled</p>                      |
|                                                                                                                                                                                                                        | <p><b>Promoting home-care for vulnerable people, avoiding institutionalization</b></p>               | <p>Provision of support and assistance to carry out day to day activities at home and outside home.</p> <p>Promote assisted cohousing and the development of supportive housing solutions.</p> <p>Provide information, orientation and support to Care Givers (Alzheimer group...).</p>                                                                                                                                                                                                                                                                                                                                                                                                      | <p>Adults, elderly, disabled</p>                      |

Source: "Il programma Habitat Microaree Trieste. Linee di indirizzo progettuali e operative. Available from: [https://www.disuguaglianzedisalute.it/wp-content/uploads/2019/10/01allegato-2018\\_ASUITS\\_Linee-di-indirizzo-HM.pdf](https://www.disuguaglianzedisalute.it/wp-content/uploads/2019/10/01allegato-2018_ASUITS_Linee-di-indirizzo-HM.pdf)"



1  
2  
3 The study cohort and the associated variables of interest were extracted through  
4 record linkage with the administrative databases of the Regional Repository of  
5 MicroData (RRMD) of the Friuli Venezia Giulia region, using an anonymous identifier.  
6  
7 The general population was made up by subjects who had lived in Trieste  
8 continuously in the four years preceding 2006. Based on the address of each subject  
9 on 1 January 2006, the general population was categorized as: 1) 'resident in a  
10 microarea (M)' 2) 'non resident in a microarea (NM)'. In order to make the two groups  
11 comparable, each M subject was matched with a NM subject through propensity  
12 score [32, 33]. We used the Nearest Neighbour Matching method with a greedy  
13 algorithm without replacement. [34-36] The matching variables were: sex, the 2001  
14 deprivation index by Caranci, [37] age on 1 January 2006, the Charlson index [38]  
15 constructed using hospital admissions in the four years preceding 1 January 2006, use  
16 of selected drugs in the year prior to 1 January 2006, identified according to the  
17 Anatomical Therapeutic Chemical classification system (ATC). [39] The Caranci  
18 deprivation index is an estimate obtained by summing the standardized indicators of  
19 five traits, low level of education, unemployment, non-home ownership, one parent  
20 family and overcrowding, that operationally combined represent the  
21 multidimensionality of the social and material concept of deprivation.[37] The  
22 deprivation index by Caranci is available for each census block level in Italy. In our  
23 study, the categorized deprivation Caranci index was assigned based on the census  
24 block level of the subject's residence. The Charlson index predicts the mortality risk  
25 of a patient who has had one or more hospital admissions for a range of comorbid  
26 conditions in a defined time period. For each identified comorbid condition a score is  
27 assigned, that depends on the risk of dying from that condition. [38] We considered  
28 hypertension drugs (ATC: 'C02', 'C03', 'C04', 'C07', 'C08'), diabetes drugs (ATC: 'A10A',  
29 'A10B', 'A10X') and ulcer drugs (ATC: from 'A02BC01' to 'A02BC05', 'A02BA', 'A02AA',  
30 'A02AB', 'A02AC', 'A02AD', 'A02AF', 'A02AG', 'A02AH', 'A02AX', 'A02X', from  
31  
32  
33  
34  
35  
36  
37  
38  
39  
40  
41  
42  
43  
44  
45  
46  
47  
48  
49  
50  
51  
52  
53  
54  
55  
56  
57  
58  
59  
60



1  
2  
3 'A02BD01' to 'A02BD07', 'A02BB', 'A02BX'). We matched five 'non microarea'  
4 subjects to each 'microarea' subject by propensity score. Out of the five 'non  
5 microarea' subjects, we selected the one whose residence was closer to the residence  
6 of the matched 'microarea' subject.  
7  
8  
9

10  
11 At the end of the matching process we obtained a cohort in which we considered as  
12 'participant' to HM program the subjects who lived in a microarea continuously during  
13 the follow-up period (MP), and as 'non participant' to HM program the subjects who  
14 lived in a non-microarea for any length of time during the follow-up period (NMP). In  
15 order to maximize the differences between the participants to HM and the non-  
16 participants to HM, we focused our analysis only on stable residents, thus excluding  
17 individuals who alternated periods living in a microarea with periods living in a non-  
18 microarea. Furthermore, we considered the first two years as latency time. The follow  
19 up of the resulting cohort, therefore, lasted from 1 January 2008 to 31 December  
20 2015.  
21  
22  
23  
24  
25  
26  
27  
28  
29  
30  
31  
32

33 The study outcomes were 1<sup>st</sup> admission to a regional hospital, 1<sup>st</sup> admission to a local  
34 Emergency Department (ED), multiple admissions to a regional hospital and to a local  
35 ED, during the follow-up period. The 1<sup>st</sup> admission to a regional hospital was identified  
36 as the earliest hospital admission for all causes, for each International Classification  
37 of Diseases 9th edition (ICD9-CM) diagnosis class, and for each specific diagnosis  
38 (ICD9-CM defined), during the study period. The date of the admission was defined  
39 as the 'index date' and each comorbidity was identified. The 1<sup>st</sup> admission to the ED  
40 was defined as the earliest ED admission for all causes occurring during the follow-up  
41 period, with the date of admission as the 'index date'.  
42  
43  
44  
45  
46  
47  
48  
49  
50  
51

52 Admissions to regional hospitals were stratified in two groups: Ordinary  
53 (Planned+Day hospital) and Urgent, while ED admissions were analysed according to  
54 triage priority codes: white (non-urgent conditions), green (minor injuries or  
55 illnesses), yellow (potentially life threatening conditions) and red (life threatening  
56  
57  
58  
59  
60

1  
2  
3 conditions). In the analysis we also accounted for multiple hospital admissions and for  
4 multiple ED admissions. Multiple admissions were defined as repeated admissions of  
5 the same patient during the study period. We categorised multiple admissions in  
6 three classes: 0 admissions, 1 admission,  $\geq 2$  admissions.  
7  
8  
9

10  
11 Participants and non-participants in the HM project intervention were compared in  
12 terms of 1<sup>st</sup> hospital admission and 1<sup>st</sup> access to ED, using Cox regression models.  
13  
14 Person-time was calculated as difference between index date and beginning of  
15 follow-up. Multiple hospital admissions and ED accesses were analysed using ordered  
16 logistic regression models setting as reference the 0-category. All models were  
17 adjusted by age at the start of follow-up, by Charlson index and by the Caranci 2001  
18 deprivation index, and stratified by sex. The statistical software used for the analysis  
19 was the SAS software, Version 9.4 (SAS Institute Inc., Cary, NC, USA). This study was  
20 conducted in accordance with the 1964 Helsinki declaration and its later  
21 amendments.  
22  
23  
24  
25  
26  
27  
28  
29  
30  
31  
32  
33

### 34 **Patient and Public Involvement statement**

35  
36  
37 Anonymised patient data, from administrative databases, were used in this study;  
38 neither the patients nor the public were personally involved.  
39  
40  
41

### 42 **Ethics approval**

43  
44  
45 This study did not require ethical approval since data were extracted from the  
46 administrative databases of the Regional Repository of MicroData using an  
47 anonymous identifier.  
48  
49  
50  
51

### 52 **Results**

53  
54  
55 At enrolment, the MP subjects were 10,588, and a corresponding number of matched  
56 NMP subjects was identified. The stable residents at the beginning of the follow-up  
57 period were a total of 16,256 (Table 2).  
58  
59  
60

Table 2. Microarea participant (MP) and Non Microarea participant (NMP) stable residents

|                      | MP (n. 6963) |              | NMP (n. 9293) |              |
|----------------------|--------------|--------------|---------------|--------------|
|                      | Females      | Males        | Females       | Males        |
| <b>n. (%)</b>        | 3793 (54.5%) | 3170 (45.5%) | 5020 (54.0%)  | 4273 (46.0%) |
| <b>Mean age (sd)</b> | 57.7 (19.7)  | 53.6 (19.8)  | 54.5 (22.3)   | 50.3 (20.6)  |

The total follow-up time was 80325.19 years, with mean value equal to 4.90 years (median=5.5 years; Q1=1.9 years; Q3=8 years). The Hazard Ratio (HR) that compares MP and NMP for 1<sup>st</sup> hospital admission for all causes was 0.95 (95%CI 0.91 – 0.99) while HRs for planned and urgent 1<sup>st</sup> admissions were, respectively, 0.97 (95%CI 0.91 – 1.02) and 0.95 (95%CI 0.90 – 1.01) (Figure 1). Stratifying by gender, while in males, MP and NMP hazards for 1<sup>st</sup> admissions seemed to be broadly the same, in females the HR for 1<sup>st</sup> planned admission was 0.95 (95%CI 0.88 – 1.02) and for urgent admission was 0.91 (95%CI 0.87 – 0.97) (Figure 2). When the analysis focused on the specific causes of hospitalization, i.e., by ICD9-CM diagnosis blocks, the HR of 1<sup>st</sup> urgent admission for mental disorders in females was 0.39 (95%CI 0.18 – 0.82). An increased, albeit not statistically significant, HR for planned admissions for mental disorders was also observed [HR 1.51 (95%CI 0.76 – 2.96)] (Figure 3). Again in females, the HR for 1<sup>st</sup> urgent hospitalization caused by diseases of the genitourinary system was 0.74 (95%CI 0.49 – 1.11), whereas for planned admissions the HR was 1.03 (95%CI 0.82 – 1.31). Analysis of data on hospitalization for diseases of the circulatory and respiratory systems showed a different pattern: HRs for circulatory system diseases were 1.15 (95%CI 0.98 – 1.35) for urgent hospitalization, and 0.91 (95%CI 0.70 – 1.81) for planned admissions. HRs for respiratory system diseases were 0.95 (95%CI 0.74 – 1.21) for urgent and 0.63 (95%CI 0.42 – 0.94) for planned hospitalizations, respectively.

In males, the most relevant results concerns hospitalization for diseases of the genitourinary system, with HR for 1<sup>st</sup> urgent admissions equal to 0.65 (95%CI 0.42 –

1.01), and for diseases of the circulatory system, with HR equal to 0.91 (IC95% 0.77 – 1.08) for 1<sup>st</sup> urgent hospitalization and 1.37 (95%CI 1.08 – 1.74) for planned admissions (Figure 4).

Focusing on the specific diagnoses, some relevant results emerged: in females, the HR for 1<sup>st</sup> urgent admission for psychosis (n.27; ICD9-CM 290-299) was equal to 0.15 (95%CI 0.05 – 0.51), while for acute respiratory infections (n.34; ICD9-CM 460-466) HR was 0.44 (95%CI 0.21 – 0.95). In males, the HR for 1<sup>st</sup> urgent admission for psychoses (n.21) was 0.49 (95%CI 0.19 – 1.27), and for other forms of heart disease (n. 197; ICD9-CM 420-429) 0.72 (95%CI 0.54 – 0.97). Regarding multiple admissions for all causes (Table 3), the Odds Ratio (OR) was 0.93 (95% 0.89 – 0.98) in females and 0.98 (95%CI 0.93 – 1.03) in males.

Table 3. Frequency distribution of all multiple hospital admissions (urgent+planned) by type of participant and gender

| MULTIPLE ADMISSIONS | PARTECIPANT   | SEX | FREQ | %    |
|---------------------|---------------|-----|------|------|
| ≥ 2 admissions      | MICROAREA     | F   | 1318 | 23.9 |
|                     |               | M   | 1103 | 20.0 |
|                     | NOT MICROAREA | F   | 1732 | 31.4 |
|                     |               | M   | 1357 | 24.6 |

For urgent hospitalizations (Table 4), the OR was 0.95 (95%CI 0.90 – 1.00) in females and 1.03 (95%CI 0.96 – 1.09) in males.

Table 4. Frequency distribution of multiple urgent hospital admissions by type of participant and gender

| MULTIPLE ADMISSIONS | PARTECIPANT   | SEX | FREQ | %    |
|---------------------|---------------|-----|------|------|
| ≥ 2 admissions      | MICROAREA     | F   | 681  | 23.7 |
|                     |               | M   | 607  | 21.2 |
|                     | NOT MICROAREA | F   | 886  | 30.9 |
|                     |               | M   | 695  | 24.2 |

Of particular relevance was the OR for multiple urgent admissions for fractures (ICD9-CM 800-829) in females, equal to 0.75 (95%CI 0.58 – 0.97). Analysing hazards for 1<sup>st</sup>

1  
2  
3 access to ED, a slight reduction emerged for white codes, both in females and in  
4 males; the HRs were respectively 0.97 (95%CI 0.89 – 1.05) and 0.94 (95%CI 0.86 –  
5 1.03). This reduction was found also for green codes but only in females: HR 0.94  
6 (95%CI 0.87-1.00). For other priority codes, no risk differences emerged (data not  
7 shown). For what concerns multiple accesses to ED, again a minor reduction emerged  
8 for white codes both in females and in males, with ORs respectively equal to 0.97  
9 (95%CI 0.91 – 1.02) and 0.97 (95%CI 0.92 – 1.03), and for green codes, but only in  
10 females, with OR equal to 0.95 (95%CI: 0.91-1.00). No further significant results  
11 emerged for other priority codes (data not shown).  
12  
13  
14  
15  
16  
17  
18  
19  
20  
21  
22

## 23 Discussion

24  
25  
26 We focused on the hazards of 1<sup>st</sup> hospitalization as main measurable outcomes, under  
27 the hypothesis that after the 1<sup>st</sup> hospital access patients are more likely to be involved  
28 in a controlled clinical follow-up and, therefore, subsequent hospital admissions may  
29 not be independent events. Our results show a slight reduction in hazard of 1<sup>st</sup>  
30 hospitalization for all causes in MP. For urgent admissions in females, the reduction  
31 appears to be more pronounced. Similarly, hazards for 1<sup>st</sup> access to ED for the lowest  
32 priority access code, both in females and in males, seem to be slightly decreased. This  
33 reduction was found also for green codes but only in females, while for other priority  
34 codes, no risk differences emerged. In the literature, interventions such as patient  
35 education, needs assessment, telephone support and follow-up have been shown to  
36 effectively reduce hospital admissions. [40] A meta-analysis by Panagioti et al. [41]  
37 showed that interventions aimed at improving self-management support, reduced  
38 health services utilization, with no negative impact on patient health outcomes; in  
39 particular, robust evidence in this sense was found for respiratory and cardiovascular  
40 disorders. Coherently with these results, in our study, MP females, showed a lower  
41 risk for acute respiratory infections, while in MP males, a lower risk of 1<sup>st</sup> urgent  
42 hospitalization for 'other forms of heart disease' was observed. However, the most  
43  
44  
45  
46  
47  
48  
49  
50  
51  
52  
53  
54  
55  
56  
57  
58  
59  
60

1  
2  
3 remarkable finding that emerged from our study concerns psychosis, particularly in  
4 females. The longitudinal SMILE study in the Netherlands (Groffen et al. 2008) [42]  
5 has shown that persons reporting material deprivation were at higher risk of physical  
6 and mental disorders. In a meta-analysis of the effect of early interventions for  
7 psychosis, Randal et al [43] describe a positive effect in terms of hospitalization  
8 reduction. McFarlane and colleagues, [44] noted that admission rates for psychotic  
9 episodes were reduced by a community-wide program of early identification and  
10 intervention initiated in 2001.

11  
12 Multiple admissions represent a patient safety concern as well as a public cost. [40]  
13 Socioeconomic status is strongly associated with hospital outcome measures and  
14 there is evidence showing that some multifaceted interventions can successfully  
15 reduce hospital readmissions. [45] In a randomized control trial carried out between  
16 1992 and 1996, Naylor and colleagues [46] studied the effectiveness of nurse-  
17 centered discharge planning and follow-up intervention for subjects at higher risk of  
18 readmission. Twenty-four weeks after hospital discharge, readmission was more  
19 frequent for patients in the control group than in the intervention group.

20  
21 Our results also suggest that the HM project was effective in reducing multiple  
22 admissions for all causes in females (Table 3), and particularly for fractures.

23  
24 For what concerns ED care services, there is evidence of an increased demand in  
25 countries where population aging generates more diverse and complex care needs.  
26 [47] Factors such as lack of access to affordable primary care around-the-clock and  
27 lack of awareness of available services or of diagnostic and therapeutic protocols,  
28 explain why the demand for these services is persistently increasing. In addition,  
29 patients of low socioeconomic status tend to prefer hospital care to primary care,  
30 because hospital care is perceived as higher quality and more convenient and  
31 accessible. [48] Our results show that during the multifaceted HM project, the hazards  
32 of 1<sup>st</sup> access to ED for white codes slightly decreased, both in females and in males.  
33  
34  
35  
36  
37  
38  
39  
40  
41  
42  
43  
44  
45  
46  
47  
48  
49  
50  
51  
52  
53  
54  
55  
56  
57  
58  
59  
60

1  
2  
3 Our study presents some limitations: our data derive from administrative databases  
4 through an anonymous identifier, therefore, although in actual facts not all residents  
5 were directly involved in the HM project, for the purposes of our analysis, all residents  
6 in the selected microareas were considered as participants in the HM project. This  
7 may have introduced a certain degree of misclassification with a likely  
8 underestimation of the effectiveness of the intervention. Moreover, between 2009  
9 and 2012, the HM project was extended to a further three microareas, therefore,  
10 among those whom we considered non-participants, there were residents who were  
11 in fact involved in the intervention. Again, this might have contributed to  
12 underestimate the effectiveness of the intervention. Our results suggest that the HM  
13 programme was more effective with females; based on the reports of the multi-  
14 professional teams, a possible explanation may be that it was easier to involve  
15 females than males. This, however, represents a limitation in terms of results  
16 generalizability.  
17  
18  
19  
20  
21  
22  
23  
24  
25  
26  
27  
28  
29  
30  
31  
32

33 Our study also presents a number of strengths: it involved a wide cohort for a long  
34 follow-period and the use of administrative databases provided a complete picture of  
35 the subjects' access to health care facilities, diagnoses, therapies and procedures  
36 during the study period. To our knowledge, this is one of few studies that evaluate  
37 the effectiveness of a social intervention in terms of impact on health services. In our  
38 view, this study may represent the starting point for a more comprehensive  
39 assessment aimed at determining the impact of the HM project on the healthcare  
40 system also in terms of costs, a topic of significant interest since sustainability of the  
41 public health service is a matter of great current concern.  
42  
43  
44  
45  
46  
47  
48  
49  
50  
51  
52

## 53 **Conclusions**

54  
55  
56 Our results show that by acting on the social determinants of health, the burden on  
57 the health service can be controlled and reduced. Our evidence shows that during the  
58 follow-up period, there was a reduction of 1st urgent hospital admissions in the social  
59  
60



1  
2  
3 intervention area, especially in females and for specific diagnoses such as psychosis.  
4  
5 Also multiple admissions were decreased in the intervention group, again, mainly in  
6  
7 females and for specific diagnoses such as fractures.  
8  
9

## 10 Acknowledgements

11  
12  
13 The authors thank all the representatives of the “Habitat Microaree” project for their  
14  
15 valuable work.  
16  
17

## 18 References

- 19  
20  
21 1. Eurostat – Statistics Explained. Available from: [https://ec.europa.eu/eurostat/statistics-explained/index.php/Glossary:Material\\_deprivation](https://ec.europa.eu/eurostat/statistics-explained/index.php/Glossary:Material_deprivation)
- 22  
23 2. European Commission. Employment, Social Affairs & Inclusion: Social protection & social inclusion. Available from: <https://ec.europa.eu/social/main.jsp?langId=en&catId=750>
- 24  
25 3. OECD Social, Employment and Migration Working Papers. Measures of Material Deprivation in OECD Countries. Available from: <https://www.oecd-ilibrary.org/docserver/866767270205.pdf?expires=1589458562&id=id&accname=guest&checksum=5CDF00E1BB7C159B204BD4B268715E17>
- 26  
27 4. Townsend P. Poverty in the United Kingdom. London, Allen Lane and Penguin Books, 1979. Available from: <https://www.poverty.ac.uk/free-resources-books/poverty-united-kingdom>
- 28  
29 5. Sen A. Poor, relatively speaking. Oxford Economic Paper. 1983 Jul; 35 (2): 153-169. Available from: [www.jstor.org/stable/266264](http://www.jstor.org/stable/266264)
- 30  
31 6. Callan T, Nolan B, Whelan CT. Resources, Deprivation and the Measurement of Poverty, *Journal of Social Policy*, 1993 Apr; 22(2): 141-172. doi: 10.1017/S0047279400019280. Available from: <https://www.cambridge.org/core/journals/journal-of-social-policy/article/resources-deprivation-and-the-measurement-of-poverty/310A697F771747245FCBE991B34213C9>
- 32  
33 7. Nolan B, Whelan CT. Resources, Deprivation and Poverty. Oxford, Oxford University Press, 1996.
- 34  
35 8. Kangas O, Ritakallio VM. Different Methods- Different Results? Approaches to Multidimensional Poverty, in H-J Andreß (ed.), *Empirical Poverty Research in a Comparative Perspective*, Aldershot: Ashgate, 1998, pp. 167-203.
- 36  
37 9. Layte R, Matre B, Nolan B, and Whelan CT. Persistent and Consistent Poverty in the 1994 and 1995 Waves of the European Community Household Panel. *Review of Income and Wealth*. 2001 Feb; 47(4):427-449. doi: 10.1111/1475-4991.00028. Available from: <https://onlinelibrary.wiley.com/doi/abs/10.1111/1475-4991.00028>
- 38  
39 10. Whelan CT, Layte R, Matre B. Persistent Deprivation in European Union. Institute for Social and Economic Research, 2001
- 40  
41 11. Perry B. The mismatch between income measures and direct outcome measures of poverty. *Social Policy Journal of New Zealand*. 2002 Dec; 19: 101-127. Available from: <https://www.msd.govt.nz/about-msd-and-our-work/publications-resources/journals-and-magazines/social-policy-journal/spj19/mismatch-between-income-measures19-pages101-127.html#Footnotes8>
- 42  
43 12. Bradshaw J, Finch N. Overlaps in Dimensions of Poverty. *Journal of Social Policy*. 2003 Oct; 32(4): 513-525. doi:10.1017/S004727940300713X. Available from:
- 44  
45  
46  
47  
48  
49  
50  
51  
52  
53  
54  
55  
56  
57  
58  
59  
60



1  
2  
3  
4  
5  
6  
7  
8  
9  
10  
11  
12  
13  
14  
15  
16  
17  
18  
19  
20  
21  
22  
23  
24  
25  
26  
27  
28  
29  
30  
31  
32  
33  
34  
35  
36  
37  
38  
39  
40  
41  
42  
43  
44  
45  
46  
47  
48  
49  
50  
51  
52  
53  
54  
55  
56  
57  
58  
59  
60

<https://www.cambridge.org/core/journals/journal-of-social-policy/article/overlaps-in-dimensions-of-poverty/82158BFB9C2C59612F202D0592021B30>

13. Tøge AG, Bell R. Material deprivation and health: a longitudinal study. *BMC Public Health*. 2016 Aug ;16 (1):747. doi: 10.1186/s12889-016-3327-z. Available from: <https://www.ncbi.nlm.nih.gov/pmc/articles/PMC4977874/>
14. Benach J, Yasui Y, Borrell C, Sáez M, Paserin MI. Material deprivation and leading causes of death by gender: evidence from a nationwide small area study. *J Epidemiol Community Health*. 2001 Apr; 55(4):239-45. Available from: <https://jech.bmj.com/content/55/4/239.long>
15. Benach J, Yasui Y, Borrell C, Paserin MI, Martínez JM, Daponte A. The public health burden of material deprivation: excess mortality in leading causes of death in Spain. *Prev Med*. 2003 Mar; 36(3):300-8. Available from: <https://www.sciencedirect.com/science/article/pii/S0091743502000142?via%3Dihub>
16. Coster JE, Turner JK, Bradbury D, Cantrell A. Why Do People Choose Emergency and Urgent Care Services? A Rapid Review Utilizing a Systematic Literature Search and Narrative Synthesis. *Acad Emerg Med*. 2017 Sep; 24(9):1137-1149. doi: 10.1111/acem.13220. Epub 2017 Jun 19. Available from: <https://www.ncbi.nlm.nih.gov/pmc/articles/PMC5599959/>
17. Lowthian JA, Curtis AJ, Jolley DJ, Stoelwinder JU, McNeil JJ, Cameron PA. Demand at the emergency department front door: 10-year trends in presentations. *Med J Aust* 2012 Feb; 196(2):128–32. doi:10.5694/mja11.10955 Available from: <https://onlinelibrary.wiley.com/doi/full/10.5694/mja11.10955?sid=nlm%3Apubmed>
18. Drummond AJ. No room at the inn: overcrowding in Ontario's emergency departments. *CJEM*. 2002 Mar; 4(2):91–97. doi: 10.1017/s1481803500006187
19. Australian Institute of Health and Welfare. Australian Hospital Statistics 2009–10: Emergency Department Care and Elective Surgery Waiting Times. Canberra: AIHW, 2010. Available from: <https://www.aihw.gov.au/getmedia/1b305ffc-b7a4-4f80-aa66-d90614c5f8f4/12271.pdf.aspx?inline=true>
20. Nicholl J, Mason S. Return of the “corridors of shame”? *BMJ*. 2013 Jul; 346:F4343. doi: <https://doi.org/10.1136/bmj.f4343>
21. Huntley A, Lasserson D, Wye L, et al. Which features of primary care affect unscheduled secondary care use? A systematic review. *BMJ Open*. 2014; 4:e004746. doi: 10.1136/bmjopen-2013-004746 Available from: <https://bmjopen.bmj.com/content/bmjopen/4/5/e004746.full.pdf>
22. Brokamp C, Beck AF, Goyal NK, Ryan P, Greenberg JM, Hall ES. Material community deprivation and hospital utilization during the first year of life: an urban population-based cohort study. *Ann Epidemiol*. 2019 Feb; 30:37-43. doi: 10.1016/j.annepidem.2018.11.008. Available from: <https://www.sciencedirect.com/science/article/pii/S1047279718305453?via%3Dihub>
23. Raphael D. *Social Determinants of Health: Canadian Perspectives* (2<sup>nd</sup> ed.). Toronto ON: Canadian Scholars' Press Inc, 2009.
24. Braveman P, Gottlieb L. The Social Determinants of Health: It's Time to Consider the Causes of the Causes. *Public Health Rep*. 2014 Jan-Feb; 129(Suppl 2): 19–31. doi: 10.1177/00333549141291S206
25. Committee on Integrating Primary Care and Public Health, Board on Population Health and Public Health Practice, Institute of Medicine. *Primary care and public health: exploring integration to improve population health*. Washington: National Academies Press; 2012.
26. Gruen RL, Pearson SD, Brennan TA. Physician-citizens—public roles and professional obligations. *JAMA*. 2004 Jan; 291(1):94–98. doi:10.1001/jama.291.1.94
27. Gallio G, Cogliati Dezza MG. “La città che cura. Microaree e periferie della salute” Edizioni Alpha Beta Verlag. Merano 2018
28. Foot J., “La Repubblica dei matti. Franco Basaglia e la psichiatria radicale in Italia, 1961-1978”, Milano, Feltrinelli, 2014, Available from: <http://journals.openedition.org/diacronie/4210>

- 1
  - 2
  - 3
  - 4
  - 5
  - 6
  - 7
  - 8
  - 9
  - 10
  - 11
  - 12
  - 13
  - 14
  - 15
  - 16
  - 17
  - 18
  - 19
  - 20
  - 21
  - 22
  - 23
  - 24
  - 25
  - 26
  - 27
  - 28
  - 29
  - 30
  - 31
  - 32
  - 33
  - 34
  - 35
  - 36
  - 37
  - 38
  - 39
  - 40
  - 41
  - 42
  - 43
  - 44
  - 45
  - 46
  - 47
  - 48
  - 49
  - 50
  - 51
  - 52
  - 53
  - 54
  - 55
  - 56
  - 57
  - 58
  - 59
  - 60
29. Panizon F. "Cari genitori, cari nonni, cari insegnanti, cari pediatri." di Editore: Medico e Bambino, 2014, EAN: 9788890795299 ISBN: 8890795298
30. Demography in Figures. National Institute of Statistics. Available from: <http://demo.istat.it/>
31. Il programma Habitat Microaree Trieste. Linee di indirizzo progettuali e operative. Available from: [https://www.disuguaglianzedisalute.it/wp-content/uploads/2019/10/01allegato-2018\\_ASUITS\\_Linee-di-indirizzo-HM.pdf](https://www.disuguaglianzedisalute.it/wp-content/uploads/2019/10/01allegato-2018_ASUITS_Linee-di-indirizzo-HM.pdf)
32. Rosenbaum P.R., Rubin D.B. The central role of the propensity score in observational studies for causal effects. *Biometrika*. 1983a; 70:41–55. doi: 10.1146/annurev.publhealth.21.1.121. Available from: <https://doi.org/10.1093/biomet/70.1.41>
33. Austin PC. An Introduction to Propensity Score Methods for Reducing the Effects of Confounding in Observational Studies. *Multivariate Behav Res*. 2011; 46(3): 399–424. doi: 10.1080/00273171.2011.568786. Available from: <https://www.tandfonline.com/doi/full/10.1080/00273171.2011.568786>
34. Rosenbaum PR. *Observational studies*. 2nd ed. New York, NY: Springer-Verlag; 2002. ISBN 978-1-4757-3692-2
35. Rosenbaum PR, Rubin DB. Constructing a control group using multivariate matched sampling methods that incorporate the propensity score. *The American Statistician*. 1985 Feb; 39 (1): 33–38. Available from: <https://dash.harvard.edu/handle/1/3425853>
36. Parsons LS. Reducing Bias in a Propensity Score Matched-Pair Sample Using Greedy Matching Techniques. *Proceedings of the Twenty-Six Annual SAS® Users Group International Conference*, Cary, NC: SAS Institute Inc., 2000; 214-226. Available from: <https://support.sas.com/resources/papers/proceedings/proceedings/sugi26/p214-26.pdf>
37. Caranci N, Biggeri A, Grisotto L, Pacelli B, Spadea T, Costa G. The Italian deprivation index at census block level: definition, description and association with general mortality. *Epidemiol Prev*. 2010 Jul-Aug; 34(4):167-176. Available from: [http://www.epiprev.it/articolo\\_scientifico/l%E2%80%99indice-di-deprivazione-italiano-livello-di-sezione-di-censimento-definizione-](http://www.epiprev.it/articolo_scientifico/l%E2%80%99indice-di-deprivazione-italiano-livello-di-sezione-di-censimento-definizione-)
38. Charlson ME, Pompei P, Ales KL, MacKenzie CR. A new method of classifying prognostic comorbidity in longitudinal studies: development and validation. *J Chronic Dis*. 1987 Jan; 40(5):373-83. doi: 10.1016/0021-9681(87)90171-8
39. Anatomical Therapeutic Chemical classification system. Available from: [https://www.whocc.no/atc\\_ddd\\_index/](https://www.whocc.no/atc_ddd_index/)
40. Kripalani S, Theobald CN, Anctil B, Vasilevskis EE. Reducing hospital readmission rates: current strategies and future directions. *Annu Rev Med*. 2014 Jan; 65:471-485. doi: 10.1146/annurev-med-022613-090415 Available from: <https://www.ncbi.nlm.nih.gov/pmc/articles/PMC4104507/>
41. Panagioti M, Richardson G, Small N, Murray E, Rogers A, Kennedy A, Newman S, Bower P. Self-management support interventions to reduce health care utilisation without compromising outcomes: a systematic review and meta-analysis. *BMC Health Serv Res*. 2014 Aug; 14:356. doi: 10.1186/1472-6963-14-356 Available from: <https://bmchealthservres.biomedcentral.com/articles/10.1186/1472-6963-14-356>
42. Groffen DA, Bosma H, van den Akker M, Kempen GI, van Eijk JT. Material deprivation and health-related dysfunction in older Dutch people: findings from the SMILE study. *Eur J Public Health*. 2008 Jun; 18(3):258-63. doi: 10.1093/eurpub/ckm119. Available from: <https://academic.oup.com/eurpub/article/18/3/258/519950>
43. Randall JR, Vokey S, Loewen H, Martens PJ, Brownell M, Katz A, Nickel NC, Burland E, Chateau D. A Systematic Review of the Effect of Early Interventions for Psychosis on the Usage of Inpatient Services. *Schizophr Bull*. 2015 Nov; 41(6):1379-86. doi: 10.1093/schbul/sbv016. Available from: <https://academic.oup.com/schizophreniabulletin/article/41/6/1379/2526024>

1  
2  
3  
4  
5  
6  
7  
8  
9  
10  
11  
12  
13  
14  
15  
16  
17  
18  
19  
20  
21  
22  
23  
24  
25  
26  
27  
28  
29  
30  
31  
32  
33  
34  
35  
36  
37  
38  
39  
40  
41  
42  
43  
44  
45  
46  
47  
48  
49  
50  
51  
52  
53  
54  
55  
56  
57  
58  
59  
60

44. McFarlane WR, Susser E, McCleary R, Verdi M, Lynch S, Williams D, McKeague IW. Reduction in incidence of hospitalizations for psychotic episodes through early identification and intervention. *Psychiatr Serv*. 2014 Oct; 65(10):1194-200. doi: 10.1176/appi.ps.201300336. Available from: <https://ps.psychiatryonline.org/doi/full/10.1176/appi.ps.201300336>
45. Krumholz HM, Bernheim SM. Considering the role of socioeconomic status in hospital outcomes measures. *Ann Intern Med*. 2014 Dec; 161(11):833-834. doi: 10.7326/M14-2308. Available from: <https://annals.org/aim/fullarticle/1983521/considering-role-socioeconomic-status-hospital-outcomes-measures>
46. Naylor MD, Brooten D, Campbell R, Jacobsen BS, Mezey MD, Pauly MV, Schwartz JS. Comprehensive discharge planning and home follow-up of hospitalized elders: a randomized clinical trial. *JAMA*. 1999 Feb; 281(7):613-20. doi: 10.1001/jama.281.7.613. Available from: <https://jamanetwork.com/journals/jama/fullarticle/188788>
47. Joynt Maddox KE, Reidhead M, Hu J, Kind AJH, Zaslavsky AM, Nagasako EM, Nerenz DR. Adjusting for social risk factors impacts performance and penalties in the hospital readmissions reduction program. *Health Serv Res*. 2019 Apr; 54(2):327-336. doi: 10.1111/1475-6773.13133. Available from: <https://onlinelibrary.wiley.com/doi/full/10.1111/1475-6773.13133>
48. Kangovi S, Barg FK, Carter T, Long JA, Shannon R, Grande D. Understanding why patients of low socioeconomic status prefer hospitals over ambulatory care. *Health Aff (Millwood)*. 2013 Jul; 32(7):1196-1203. doi: 10.1377/hlthaff.2012.0825. Available from: <https://www.healthaffairs.org/doi/pdf/10.1377/hlthaff.2012.0825>

## Copyright

The Corresponding Author has the right to grant on behalf of all authors and does grant on behalf of all authors, an exclusive licence on a worldwide basis to the BMJ Publishing Group Ltd to permit this article (if accepted) to be published in BMJ editions and any other BMJ PGL products and sublicences such use and exploit all subsidiary rights.

## Competing interests declaration

All authors have completed the ICMJE uniform disclosure form at [www.icmje.org/coi\\_disclosure.pdf](http://www.icmje.org/coi_disclosure.pdf) and declare: this retrospective cohort study was supported by a fund allocated by the local health authority of Trieste "Azienda Sanitaria Universitaria Integrata di Trieste" on 31<sup>st</sup> August 2016 (CUP E97B16000340002); no financial relationships with any organisations that might have an interest in the submitted work in the previous three years; no other relationships or activities that could appear to have influenced the submitted work.

## Contributors

LC, FB, MGCD and FP conceived, designed and coordinated the study. MS, EA CE and FP collected data. MG, LC, VR defined the statistical analysis plan and performed the analysis. LC, MG, FB, MGCD and FP interpreted the results. LC and MG drafted the paper. FB, MGCD, MS, EA CE, FP and VR critically revised the manuscript.

## Transparency statement

All authors declare that this manuscript is an honest, accurate, and transparent account of the study being reported; no relevant aspects of the study have been omitted. The study has been conducted as it was planned, with no relevant discrepancies.

## Role of the funding source

This retrospective cohort study was supported by a fund allocated by the local health authority of Trieste “Azienda Sanitaria Universitaria Integrata di Trieste” on 31<sup>st</sup> August 2016 (CUP E97B16000340002) through an *ad hoc* agreement with the University of Udine. Researchers acted independently from the funder and all authors had full access to all data (including statistical reports and tables) in the study and can take responsibility for the integrity of the data and the accuracy of the data analysis.

## Data sharing statement

All data relevant to the study are included in the article. No additional data available.

## Dissemination declaration

The results of this retrospective cohort study were presented to public healthcare authorities, non-profit organisations, social housing, and citizens, during an *ad hoc* conference held in Trieste on 14 and 15 June 2018.

1  
2  
3  
4  
5  
6  
7  
8  
9  
10  
11  
12  
13  
14  
15  
16  
17  
18  
19  
20  
21  
22  
23  
24  
25  
26  
27  
28  
29  
30  
31  
32  
33  
34  
35  
36  
37  
38  
39  
40  
41  
42  
43  
44  
45  
46  
47  
48  
49  
50  
51  
52  
53  
54  
55  
56  
57  
58  
59  
60

## Figure legends

**Figure 1.** HRs for 1st hospital admission; MP vs NMP. Analysis adjusted for age and Charlson and deprivation indexes

**Figure 2.** HRs for 1st hospital admission; MP vs NMP by gender. Analysis adjusted for age and Charlson and deprivation indexes

**Figure 3.** HRs for 1st hospital admission by ICD-9-CM blocks of diagnosis; MP vs NMP (females). Analysis adjusted for age and Charlson and deprivation indexes

**Figure 4.** HRs for 1st hospital admission by ICD-9-CM blocks of diagnosis; MP vs NMP (males). Analysis adjusted for age and Charlson and deprivation indexes

1  
2  
3  
4  
5  
6  
7  
8  
9  
10  
11  
12  
13  
14  
15  
16  
17  
18  
19  
20  
21  
22  
23  
24  
25  
26  
27  
28  
29  
30  
31  
32  
33  
34  
35  
36  
37  
38  
39  
40  
41  
42  
43  
44  
45  
46  
47  
48  
49  
50  
51  
52  
53  
54  
55  
56  
57  
58  
59  
60

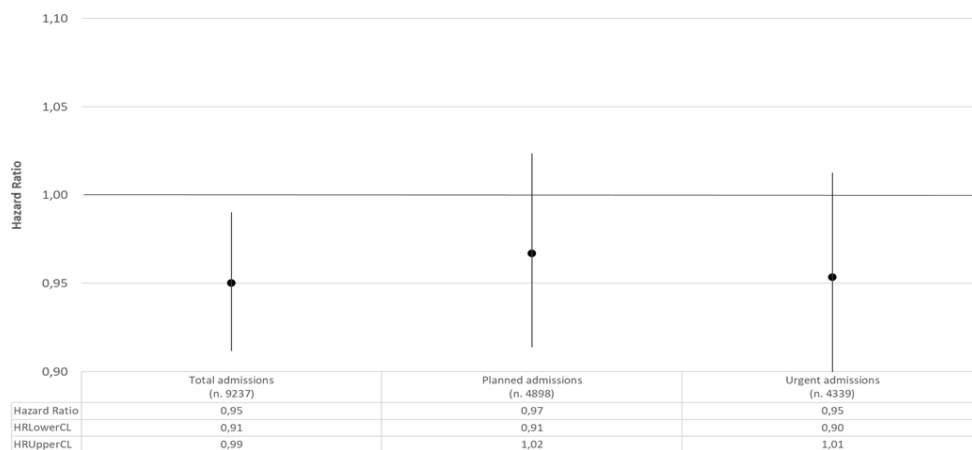

Figure 1. HRs for 1st hospital admission; MP vs NMP. Analysis adjusted for age and Charlson and deprivation indexes

90x90mm (300 x 300 DPI)

1  
2  
3  
4  
5  
6  
7  
8  
9  
10  
11  
12  
13  
14  
15  
16  
17  
18  
19  
20  
21  
22  
23  
24  
25  
26  
27  
28  
29  
30  
31  
32  
33  
34  
35  
36  
37  
38  
39  
40  
41  
42  
43  
44  
45  
46  
47  
48  
49  
50  
51  
52  
53  
54  
55  
56  
57  
58  
59  
60

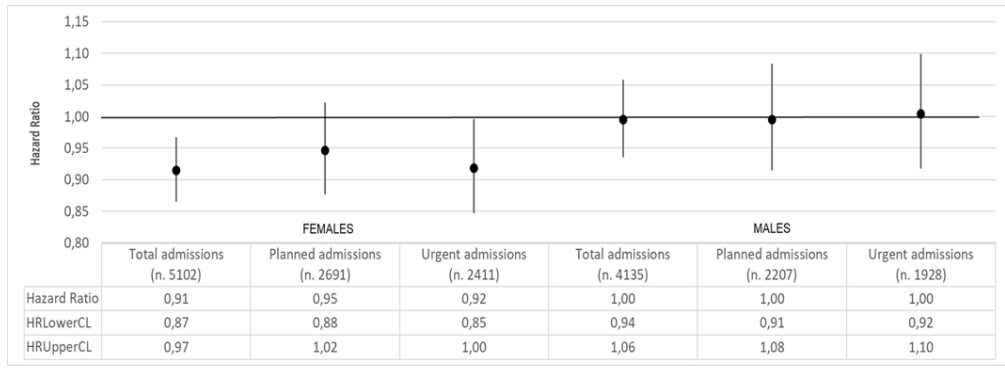

Figure 2. HRs for 1st hospital admission; MP vs NMP by gender. Analysis adjusted for age and Charlson and deprivation indexes

90x90mm (300 x 300 DPI)

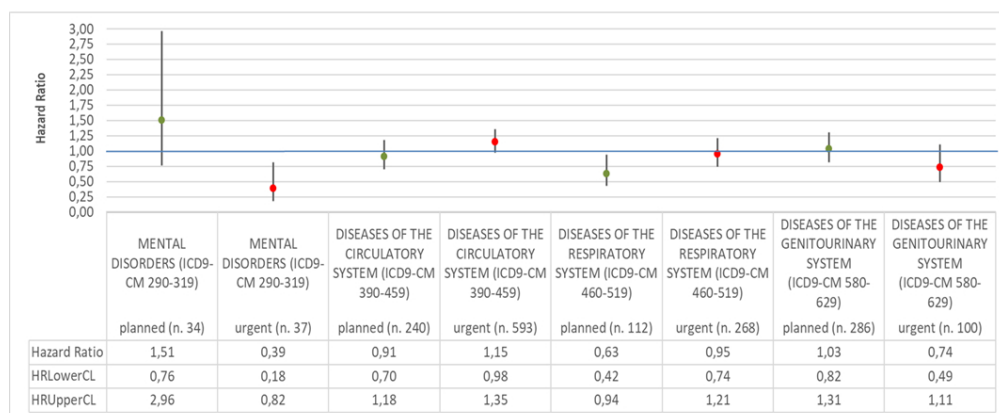

Figure 3. HRs for 1st hospital admission by ICD-9-CM blocks of diagnosis; MP vs NMP (females). Analysis adjusted for age and Charlson and deprivation indexes

90x90mm (300 x 300 DPI)



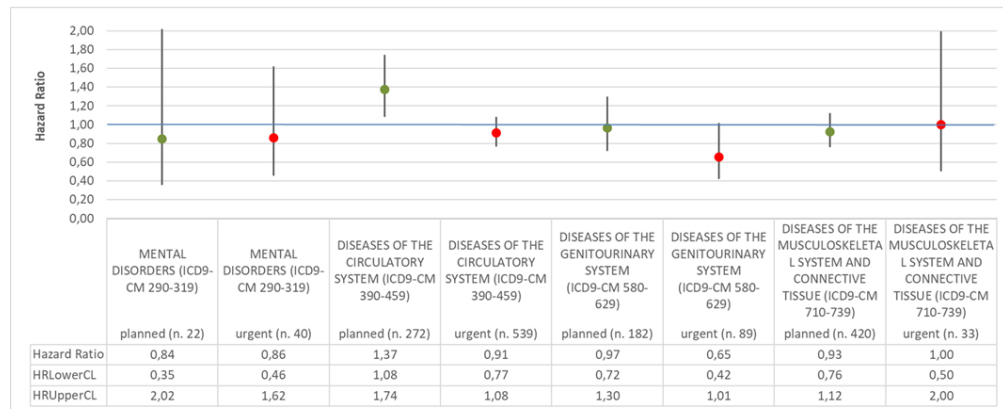

Figure 4. HRs for 1st hospital admission by ICD-9-CM blocks of diagnosis; MP vs NMP (males). Analysis adjusted for age and Charlson and deprivation indexes

90x90mm (300 x 300 DPI)

STROBE Statement—Checklist of items that should be included in reports of *cohort studies*

|                              | Item No | Recommendation                                                                                                                                                                                                         |
|------------------------------|---------|------------------------------------------------------------------------------------------------------------------------------------------------------------------------------------------------------------------------|
| <b>Title and abstract</b>    | 1       | (a) Indicate the study's design with a commonly used term in the title or the abstract<br><b>Page 1</b>                                                                                                                |
|                              |         | (b) Provide in the abstract an informative and balanced summary of what was done and what was found<br><b>Page 2</b>                                                                                                   |
| <b>Introduction</b>          |         |                                                                                                                                                                                                                        |
| Background/rationale         | 2       | Explain the scientific background and rationale for the investigation being reported<br><b>Page 3</b>                                                                                                                  |
| Objectives                   | 3       | State specific objectives, including any prespecified hypotheses<br><b>Pages 5-6</b>                                                                                                                                   |
| <b>Methods</b>               |         |                                                                                                                                                                                                                        |
| Study design                 | 4       | Present key elements of study design early in the paper<br><b>Pages 6-8</b>                                                                                                                                            |
| Setting                      | 5       | Describe the setting, locations, and relevant dates, including periods of recruitment, exposure, follow-up, and data collection<br><b>Pages 6-7</b>                                                                    |
| Participants                 | 6       | (a) Give the eligibility criteria, and the sources and methods of selection of participants. Describe methods of follow-up<br><b>Pages 6-7</b>                                                                         |
|                              |         | (b) For matched studies, give matching criteria and number of exposed and unexposed<br><b>Page 6 for matching criteria and Results, page 8 for number of exposed and unexposed (participants and not participants)</b> |
| Variables                    | 7       | Clearly define all outcomes, exposures, predictors, potential confounders, and effect modifiers. Give diagnostic criteria, if applicable<br><b>Page 7</b>                                                              |
| Data sources/<br>measurement | 8*      | For each variable of interest, give sources of data and details of methods of assessment (measurement). Describe comparability of assessment methods if there is more than one group<br><b>Pages 6-8</b>               |
| Bias                         | 9       | Describe any efforts to address potential sources of bias<br><b>Pages 7-8</b>                                                                                                                                          |
| Study size                   | 10      | Explain how the study size was arrived at<br><b>Page 6</b>                                                                                                                                                             |
| Quantitative variables       | 11      | Explain how quantitative variables were handled in the analyses. If applicable, describe which groupings were chosen and why<br><b>Pages 7-8</b>                                                                       |
| Statistical methods          | 12      | (a) Describe all statistical methods, including those used to control for confounding<br><b>Pages 7-8</b>                                                                                                              |
|                              |         | (b) Describe any methods used to examine subgroups and interactions <b>Pages 7-8</b>                                                                                                                                   |
|                              |         | (c) Explain how missing data were addressed <b>Not applicable</b>                                                                                                                                                      |
|                              |         | (d) If applicable, explain how loss to follow-up was addressed <b>Not applicable</b>                                                                                                                                   |
|                              |         | (e) Describe any sensitivity analyses <b>Not applicable</b>                                                                                                                                                            |
| <b>Results</b>               |         |                                                                                                                                                                                                                        |
| Participants                 | 13*     | (a) Report numbers of individuals at each stage of study—eg numbers potentially                                                                                                                                        |

|                          |     |                                                                                                                                                                                                                                                                                                                            |
|--------------------------|-----|----------------------------------------------------------------------------------------------------------------------------------------------------------------------------------------------------------------------------------------------------------------------------------------------------------------------------|
|                          |     | eligible, examined for eligibility, confirmed eligible, included in the study, completing follow-up, and analysed <a href="#">Page 8</a>                                                                                                                                                                                   |
|                          |     | (b) Give reasons for non-participation at each stage <a href="#">Not applicable</a>                                                                                                                                                                                                                                        |
|                          |     | (c) Consider use of a flow diagram <a href="#">Not applicable</a>                                                                                                                                                                                                                                                          |
| Descriptive data         | 14* | (a) Give characteristics of study participants (eg demographic, clinical, social) and information on exposures and potential confounders <a href="#">Not applicable</a>                                                                                                                                                    |
|                          |     | (b) Indicate number of participants with missing data for each variable of interest <a href="#">Not applicable</a>                                                                                                                                                                                                         |
|                          |     | (c) Summarise follow-up time (eg, average and total amount) <a href="#">Page 8</a>                                                                                                                                                                                                                                         |
| Outcome data             | 15* | Report numbers of outcome events or summary measures over time <a href="#">Tables 2 and 3 pages 9 and 10</a>                                                                                                                                                                                                               |
| Main results             | 16  | (a) Give unadjusted estimates and, if applicable, confounder-adjusted estimates and their precision (eg, 95% confidence interval). Make clear which confounders were adjusted for and why they were included <a href="#">See page 8, for list of confounders and Figures 1 to 4 for adjusted estimates and confounders</a> |
|                          |     | (b) Report category boundaries when continuous variables were categorized <a href="#">Not applicable</a>                                                                                                                                                                                                                   |
|                          |     | (c) If relevant, consider translating estimates of relative risk into absolute risk for a meaningful time period <a href="#">Not applicable</a>                                                                                                                                                                            |
| Other analyses           | 17  | Report other analyses done—eg analyses of subgroups and interactions, and sensitivity analyses <a href="#">Not applicable</a>                                                                                                                                                                                              |
| <b>Discussion</b>        |     |                                                                                                                                                                                                                                                                                                                            |
| Key results              | 18  | Summarise key results with reference to study objectives <a href="#">Pages 10-13</a>                                                                                                                                                                                                                                       |
| Limitations              | 19  | Discuss limitations of the study, taking into account sources of potential bias or imprecision. Discuss both direction and magnitude of any potential bias <a href="#">Page 12</a>                                                                                                                                         |
| Interpretation           | 20  | Give a cautious overall interpretation of results considering objectives, limitations, multiplicity of analyses, results from similar studies, and other relevant evidence <a href="#">Discussion, pages 12 and Conclusions, page 13.</a>                                                                                  |
| Generalisability         | 21  | Discuss the generalisability (external validity) of the study results <a href="#">Page 12</a>                                                                                                                                                                                                                              |
| <b>Other information</b> |     |                                                                                                                                                                                                                                                                                                                            |
| Funding                  | 22  | Give the source of funding and the role of the funders for the present study and, if applicable, for the original study on which the present article is based <a href="#">Role of the funding source, page 14</a>                                                                                                          |

\*Give information separately for exposed and unexposed groups.

**Note:** An Explanation and Elaboration article discusses each checklist item and gives methodological background and published examples of transparent reporting. The STROBE checklist is best used in conjunction with this article (freely available on the Web sites of PLoS Medicine at <http://www.plosmedicine.org/>, Annals of Internal Medicine at <http://www.annals.org/>, and Epidemiology at <http://www.epidem.com/>). Information on the STROBE Initiative is available at <http://www.strobe-statement.org>.
